# Supplementary material for: Metabolism in a deep hypertrophic aquatic ecosystem with high water-level fluctuations: a decade of records confirms sustained net heterotrophy
Source: PeerJ. 2018 Jul 17;6:e5205. doi: 10.7717/peerj.5205 (PMC6054066; doi:10.7717/peerj.5205)
Supplement: Data S1 [file peerj-06-5205-s001.xlsx]

## Sheet: Figure 1
Date	Cota	Z
2006-01-12	1825	-5
2006-02-09	1823.6	-6.4
2006-03-09	1823.2	-6.8
2006-04-06	1822.58	-7.425
2006-05-04	1821.65	-8.35
2006-06-01	1820.78	-9.225
2006-07-06	1819.9	-10.1
2006-08-03	1821.05	-8.95
2006-09-28	1824	-6
2006-10-19	1826.3	-3.7
2006-11-16	1826.8	-3.2
2006-12-18	1826.8	-3.2
2007-01-18	1826.9	-3.1
2007-02-15	1826.8	-3.2
2007-03-15	1826.7	-3.3
2007-04-12	1823	-7
2007-05-10	1823.7	-6.3
2007-06-07	1822.5	-7.5
2007-07-05	1822.5	-7.5
2007-08-02	1823	-7
2007-09-26	1827	-3
2007-10-24	1828.6	-1.4
2007-11-21	1827.1	-2.9
2007-12-12	1826.2	-3.8
2008-01-09	1825.8	-4.2
2008-02-07	1825.3	-4.7
2008-03-06	1824.7	-5.3
2008-04-03	1823.9	-6.1
2008-05-08	1822.55	-7.45
2008-06-05	1821.2	-8.8
2008-07-02	1820.3	-9.7
2008-08-28	1820.85	-9.15
2008-09-24	1822.4	-7.6
2008-10-16	1823.4	-6.6
2008-11-13	1824	-6
2008-12-12	1824.15	-5.85
2009-01-07	1823.5	-6.5
2009-02-04	1823.05	-6.95
2009-03-04	1822.8	-7.2
2009-04-02	1822.1	-7.9
2009-05-13	1820.15	-9.85
2009-06-04	1819.83	-10.17
2009-07-02	1818.62	-11.375
2009-07-30	1818	-12
2009-09-01	1818.33	-11.675
2009-10-20	1822.62	-7.375
2009-11-12	1823.53	-6.475
2009-12-10	1824.15	-5.85
2010-01-14	1824.62	-5.375
2010-02-11	1825.58	-4.425
2010-03-11	1825.65	-4.35
2010-04-08	1826.2	-3.8
2010-05-06	1826.15	-3.85
2010-06-03	1825.35	-4.65
2010-07-29	1826.25	-3.75
2010-09-02	1828.3	-1.7
2010-09-30	1830	0
2010-10-21	1829.9	-0.1
2010-11-18	1829.6	-0.4
2010-12-16	1828.5	-1.5
2011-01-14	1828.1	-1.9
2011-02-11	1827.85	-2.15
2011-03-10	1827.17	-2.825
2011-04-07	1826.05	-3.95
2011-05-05	1825.1	-4.9
2011-06-02	1824.1	-5.9
2011-07-28	1823.58	-6.425
2011-08-22	1823.72	-6.275
2011-09-21	1825.13	-4.87
2011-10-19	1826.24	-3.76
2011-11-17	1826.7	-3.3
2011-12-15	1826.66	-3.34
2012-01-12	1826.87	-3.13
2012-02-16	1826.3	-3.7
2012-03-20	1825.1	-4.9
2012-04-24	1823.1	-6.9
2012-05-31	1822.2	-7.8
2012-06-26	1821.55	-8.45
2012-08-02	1822	-8
2012-09-06	1823.55	-6.45
2012-10-12	1824.21	-5.79
2012-11-08	1823.43	-6.57
2012-12-13	1823	-7
2013-01-17	1822.75	-7.25
2013-02-14	1823.09	-6.91
2013-03-14	1822.9	-7.1
2013-04-17	1821.4	-8.6
2013-05-23	1819.5	-10.5
2013-06-20	1818.6	-11.4
2013-08-01	1819.65	-10.35
2013-10-03	1824.08	-5.92
2013-11-06	1825.85	-4.15
2013-12-13	1827.35	-2.65
2014-01-09	1828.2	-1.8
2014-02-05	1829.18	-0.82
2014-03-13	1829.16	-0.84
2014-04-10	1828.15	-1.85
2014-05-08	1827.26	-2.74
2014-06-05	1826.55	-3.45
2014-07-02	1826.5	-3.5
2014-08-14	1826.57	-3.43
2014-09-24	1828.83	-1.17
2014-10-29	1830.2	0
2014-12-03	1830.2	0
2015-01-08	1829.95	-0.05
2015-02-05	1829.46	-0.54
2015-03-05	1828.67	-1.33
2015-04-08	1827.95	-2.05
2015-05-13	1827.35	-2.65
2015-06-10	1827.1	-2.9
2015-07-01	1826.5	-3.5
2015-08-12	1827.04	-2.96
2015-09-16	1829.25	-0.75
2015-10-15	1829.85	-0.15
2015-11-12	1829.95	-0.05
2015-12-10	1829.8	-0.2

## Sheet: Figure 2
Month	Z negative	Temp (ºC)
1	-29.083	18.2125
1	-28.0045	18.1926
1	-26.926	18.1722
1	-25.8474	18.1583
1	-24.7689	18.1613
1	-23.6904	18.1456
1	-22.6119	18.1533
1	-21.5334	18.1544
1	-20.4549	18.1524
1	-19.3763	18.1489
1	-18.2978	18.1519
1	-17.2193	18.1565
1	-16.1408	18.1684
1	-15.0623	18.1699
1	-13.9837	18.1794
1	-12.9052	18.1965
1	-11.8267	18.2066
1	-10.7482	18.22
1	-9.66967	18.2334
1	-8.59115	18.2403
1	-7.51263	18.2502
1	-6.43411	18.2573
1	-5.35559	18.2821
1	-4.27707	18.3828
1	-3.19856	18.5617
1	-2.12004	19.211
1	-1.04152	19.3303
1	0.037	19.3243
2.08081	-29.083	18.5603
2.08081	-28.0045	18.2342
2.08081	-26.926	18.1911
2.08081	-25.8474	18.1178
2.08081	-24.7689	18.0902
2.08081	-23.6904	18.1015
2.08081	-22.6119	18.112
2.08081	-21.5334	18.1183
2.08081	-20.4549	18.1163
2.08081	-19.3763	18.1166
2.08081	-18.2978	18.1133
2.08081	-17.2193	18.1304
2.08081	-16.1408	18.143
2.08081	-15.0623	18.1538
2.08081	-13.9837	18.1633
2.08081	-12.9052	18.169
2.08081	-11.8267	18.201
2.08081	-10.7482	18.2342
2.08081	-9.66967	18.2981
2.08081	-8.59115	18.3068
2.08081	-7.51263	18.3225
2.08081	-6.43411	18.348
2.08081	-5.35559	18.4267
2.08081	-4.27707	18.7884
2.08081	-3.19856	19.0236
2.08081	-2.12004	19.1294
2.08081	-1.04152	19.1513
2.08081	0.037	19.2268
3.16162	-29.083	18.6905
3.16162	-28.0045	18.596
3.16162	-26.926	18.4647
3.16162	-25.8474	18.2835
3.16162	-24.7689	18.2426
3.16162	-23.6904	18.2304
3.16162	-22.6119	18.2297
3.16162	-21.5334	18.2306
3.16162	-20.4549	18.2342
3.16162	-19.3763	18.2366
3.16162	-18.2978	18.2372
3.16162	-17.2193	18.2467
3.16162	-16.1408	18.2711
3.16162	-15.0623	18.2959
3.16162	-13.9837	18.3206
3.16162	-12.9052	18.3668
3.16162	-11.8267	18.434
3.16162	-10.7482	18.6468
3.16162	-9.66967	18.9802
3.16162	-8.59115	19.1853
3.16162	-7.51263	19.2782
3.16162	-6.43411	19.4326
3.16162	-5.35559	19.5884
3.16162	-4.27707	19.7146
3.16162	-3.19856	20.2617
3.16162	-2.12004	20.7276
3.16162	-1.04152	20.8373
3.16162	0.037	20.8526
4.24242	-29.083	18.7898
4.24242	-28.0045	18.7371
4.24242	-26.926	18.6632
4.24242	-25.8474	18.5957
4.24242	-24.7689	18.5345
4.24242	-23.6904	18.5218
4.24242	-22.6119	18.5249
4.24242	-21.5334	18.5326
4.24242	-20.4549	18.5508
4.24242	-19.3763	18.563
4.24242	-18.2978	18.5751
4.24242	-17.2193	18.5907
4.24242	-16.1408	18.596
4.24242	-15.0623	18.6561
4.24242	-13.9837	18.7376
4.24242	-12.9052	18.8849
4.24242	-11.8267	18.9503
4.24242	-10.7482	19.0794
4.24242	-9.66967	19.4687
4.24242	-8.59115	19.9713
4.24242	-7.51263	20.2776
4.24242	-6.43411	20.9526
4.24242	-5.35559	21.4576
4.24242	-4.27707	21.5088
4.24242	-3.19856	21.5805
4.24242	-2.12004	21.677
4.24242	-1.04152	21.7145
4.24242	0.037	21.713
5.32323	-29.083	18.9441
5.32323	-28.0045	18.9539
5.32323	-26.926	18.9396
5.32323	-25.8474	18.9172
5.32323	-24.7689	18.8799
5.32323	-23.6904	18.8834
5.32323	-22.6119	18.9166
5.32323	-21.5334	18.9191
5.32323	-20.4549	18.9288
5.32323	-19.3763	18.936
5.32323	-18.2978	18.9603
5.32323	-17.2193	18.9812
5.32323	-16.1408	19.0022
5.32323	-15.0623	19.078
5.32323	-13.9837	19.161
5.32323	-12.9052	19.3218
5.32323	-11.8267	19.485
5.32323	-10.7482	19.7218
5.32323	-9.66967	20.1113
5.32323	-8.59115	20.5281
5.32323	-7.51263	21.0587
5.32323	-6.43411	22.0879
5.32323	-5.35559	22.6571
5.32323	-4.27707	22.8578
5.32323	-3.19856	23.2588
5.32323	-2.12004	23.5883
5.32323	-1.04152	23.7042
5.32323	0.037	23.6189
6.40404	-29.083	19.1098
6.40404	-28.0045	19.1645
6.40404	-26.926	19.2096
6.40404	-25.8474	19.2538
6.40404	-24.7689	19.2415
6.40404	-23.6904	19.2305
6.40404	-22.6119	19.2009
6.40404	-21.5334	19.1608
6.40404	-20.4549	19.1532
6.40404	-19.3763	19.1821
6.40404	-18.2978	19.2197
6.40404	-17.2193	19.2723
6.40404	-16.1408	19.3172
6.40404	-15.0623	19.3899
6.40404	-13.9837	19.4968
6.40404	-12.9052	19.6193
6.40404	-11.8267	19.8036
6.40404	-10.7482	20.2574
6.40404	-9.66967	20.8672
6.40404	-8.59115	21.2007
6.40404	-7.51263	21.8708
6.40404	-6.43411	22.6735
6.40404	-5.35559	23.0516
6.40404	-4.27707	23.3613
6.40404	-3.19856	23.7542
6.40404	-2.12004	24.0176
6.40404	-1.04152	24.1605
6.40404	0.037	24.1017
7.48485	-29.083	19.1659
7.48485	-28.0045	19.3013
7.48485	-26.926	19.4953
7.48485	-25.8474	19.5865
7.48485	-24.7689	19.6237
7.48485	-23.6904	19.5708
7.48485	-22.6119	19.486
7.48485	-21.5334	19.4371
7.48485	-20.4549	19.4362
7.48485	-19.3763	19.5039
7.48485	-18.2978	19.594
7.48485	-17.2193	19.6185
7.48485	-16.1408	19.6788
7.48485	-15.0623	19.811
7.48485	-13.9837	19.874
7.48485	-12.9052	20.0589
7.48485	-11.8267	20.3702
7.48485	-10.7482	20.7674
7.48485	-9.66967	21.2904
7.48485	-8.59115	21.8456
7.48485	-7.51263	22.5531
7.48485	-6.43411	23.0075
7.48485	-5.35559	23.0915
7.48485	-4.27707	23.133
7.48485	-3.19856	23.1813
7.48485	-2.12004	23.3652
7.48485	-1.04152	23.5007
7.48485	0.037	23.4512
8.56566	-29.083	19.2471
8.56566	-28.0045	19.4274
8.56566	-26.926	19.6617
8.56566	-25.8474	19.9065
8.56566	-24.7689	20.0334
8.56566	-23.6904	19.9352
8.56566	-22.6119	19.7746
8.56566	-21.5334	19.8172
8.56566	-20.4549	19.8456
8.56566	-19.3763	19.8791
8.56566	-18.2978	19.9479
8.56566	-17.2193	20.0233
8.56566	-16.1408	20.1235
8.56566	-15.0623	20.2337
8.56566	-13.9837	20.2954
8.56566	-12.9052	20.4908
8.56566	-11.8267	20.8528
8.56566	-10.7482	21.1574
8.56566	-9.66967	21.5465
8.56566	-8.59115	22.0341
8.56566	-7.51263	22.4431
8.56566	-6.43411	22.6388
8.56566	-5.35559	22.7626
8.56566	-4.27707	22.8415
8.56566	-3.19856	22.8659
8.56566	-2.12004	22.8807
8.56566	-1.04152	22.8959
8.56566	0.037	22.8497
9.64646	-29.083	19.2333
9.64646	-28.0045	19.4541
9.64646	-26.926	19.7412
9.64646	-25.8474	20.1082
9.64646	-24.7689	20.4163
9.64646	-23.6904	20.4371
9.64646	-22.6119	20.385
9.64646	-21.5334	20.4114
9.64646	-20.4549	20.4459
9.64646	-19.3763	20.4739
9.64646	-18.2978	20.5169
9.64646	-17.2193	20.5915
9.64646	-16.1408	20.6717
9.64646	-15.0623	20.7684
9.64646	-13.9837	20.8829
9.64646	-12.9052	20.9577
9.64646	-11.8267	21.0576
9.64646	-10.7482	21.1856
9.64646	-9.66967	21.3074
9.64646	-8.59115	21.4528
9.64646	-7.51263	21.5628
9.64646	-6.43411	21.624
9.64646	-5.35559	21.7115
9.64646	-4.27707	21.7893
9.64646	-3.19856	21.7997
9.64646	-2.12004	21.7921
9.64646	-1.04152	21.7895
9.64646	0.037	21.7933
10.7273	-29.083	19.2008
10.7273	-28.0045	19.4224
10.7273	-26.926	19.7472
10.7273	-25.8474	19.8981
10.7273	-24.7689	20.0019
10.7273	-23.6904	20.0521
10.7273	-22.6119	20.0674
10.7273	-21.5334	20.0667
10.7273	-20.4549	20.0725
10.7273	-19.3763	20.0837
10.7273	-18.2978	20.0972
10.7273	-17.2193	20.1012
10.7273	-16.1408	20.113
10.7273	-15.0623	20.1335
10.7273	-13.9837	20.1722
10.7273	-12.9052	20.1857
10.7273	-11.8267	20.1849
10.7273	-10.7482	20.189
10.7273	-9.66967	20.1775
10.7273	-8.59115	20.1815
10.7273	-7.51263	20.1805
10.7273	-6.43411	20.2137
10.7273	-5.35559	20.2213
10.7273	-4.27707	20.2549
10.7273	-3.19856	20.3308
10.7273	-2.12004	20.8587
10.7273	-1.04152	20.9881
10.7273	0.037	21.0071
11.8081	-29.083	19.4144
11.8081	-28.0045	19.4051
11.8081	-26.926	19.4348
11.8081	-25.8474	19.4056
11.8081	-24.7689	19.3424
11.8081	-23.6904	19.3424
11.8081	-22.6119	19.3352
11.8081	-21.5334	19.3421
11.8081	-20.4549	19.346
11.8081	-19.3763	19.3477
11.8081	-18.2978	19.3552
11.8081	-17.2193	19.358
11.8081	-16.1408	19.37
11.8081	-15.0623	19.3762
11.8081	-13.9837	19.3827
11.8081	-12.9052	19.3877
11.8081	-11.8267	19.3874
11.8081	-10.7482	19.3886
11.8081	-9.66967	19.3875
11.8081	-8.59115	19.4024
11.8081	-7.51263	19.3954
11.8081	-6.43411	19.4678
11.8081	-5.35559	19.59
11.8081	-4.27707	19.725
11.8081	-3.19856	19.8147
11.8081	-2.12004	19.9708
11.8081	-1.04152	20.0164
11.8081	0.037	20.036
12.8889	-29.083	19.276
12.8889	-28.0045	19.1962
12.8889	-26.926	19.1142
12.8889	-25.8474	18.9374
12.8889	-24.7689	18.6496
12.8889	-23.6904	18.4464
12.8889	-22.6119	18.4149
12.8889	-21.5334	18.4229
12.8889	-20.4549	18.433
12.8889	-19.3763	18.4307
12.8889	-18.2978	18.4366
12.8889	-17.2193	18.4305
12.8889	-16.1408	18.4297
12.8889	-15.0623	18.4258
12.8889	-13.9837	18.4268
12.8889	-12.9052	18.4396
12.8889	-11.8267	18.4386
12.8889	-10.7482	18.4431
12.8889	-9.66967	18.4439
12.8889	-8.59115	18.4791
12.8889	-7.51263	18.5338
12.8889	-6.43411	18.5965
12.8889	-5.35559	18.6537
12.8889	-4.27707	18.6825
12.8889	-3.19856	18.9548
12.8889	-2.12004	19.1369
12.8889	-1.04152	19.2408
12.8889	0.037	19.2896
13.9697	-29.083	19.2097
13.9697	-28.0045	19.0761
13.9697	-26.926	18.9044
13.9697	-25.8474	18.6599
13.9697	-24.7689	18.3038
13.9697	-23.6904	17.9896
13.9697	-22.6119	17.9571
13.9697	-21.5334	17.9644
13.9697	-20.4549	17.9573
13.9697	-19.3763	17.9674
13.9697	-18.2978	17.9671
13.9697	-17.2193	17.965
13.9697	-16.1408	17.9707
13.9697	-15.0623	17.967
13.9697	-13.9837	17.9743
13.9697	-12.9052	17.9941
13.9697	-11.8267	18.0029
13.9697	-10.7482	18.0236
13.9697	-9.66967	18.0233
13.9697	-8.59115	18.0675
13.9697	-7.51263	18.0934
13.9697	-6.43411	18.102
13.9697	-5.35559	18.1122
13.9697	-4.27707	18.2518
13.9697	-3.19856	18.9299
13.9697	-2.12004	19.2001
13.9697	-1.04152	19.2549
13.9697	0.037	19.3129
15.0505	-29.083	19.5315
15.0505	-28.0045	19.4608
15.0505	-26.926	19.1442
15.0505	-25.8474	18.7574
15.0505	-24.7689	18.3694
15.0505	-23.6904	18.1496
15.0505	-22.6119	18.1104
15.0505	-21.5334	18.0947
15.0505	-20.4549	18.1029
15.0505	-19.3763	18.1162
15.0505	-18.2978	18.0907
15.0505	-17.2193	18.1321
15.0505	-16.1408	18.1565
15.0505	-15.0623	18.1597
15.0505	-13.9837	18.1591
15.0505	-12.9052	18.2105
15.0505	-11.8267	18.3512
15.0505	-10.7482	18.4312
15.0505	-9.66967	18.4898
15.0505	-8.59115	18.5504
15.0505	-7.51263	18.6338
15.0505	-6.43411	18.7776
15.0505	-5.35559	18.8492
15.0505	-4.27707	19.0067
15.0505	-3.19856	19.5524
15.0505	-2.12004	19.7253
15.0505	-1.04152	19.7234
15.0505	0.037	19.7704
16.1313	-29.083	19.0726
16.1313	-28.0045	19.2064
16.1313	-26.926	18.9909
16.1313	-25.8474	18.8294
16.1313	-24.7689	18.7703
16.1313	-23.6904	18.5571
16.1313	-22.6119	18.4489
16.1313	-21.5334	18.4217
16.1313	-20.4549	18.4317
16.1313	-19.3763	18.4479
16.1313	-18.2978	18.4619
16.1313	-17.2193	18.4857
16.1313	-16.1408	18.5114
16.1313	-15.0623	18.5553
16.1313	-13.9837	18.6033
16.1313	-12.9052	18.6367
16.1313	-11.8267	18.6705
16.1313	-10.7482	18.7038
16.1313	-9.66967	18.8634
16.1313	-8.59115	19.0635
16.1313	-7.51263	19.3605
16.1313	-6.43411	20.1846
16.1313	-5.35559	20.669
16.1313	-4.27707	20.9284
16.1313	-3.19856	21.0688
16.1313	-2.12004	21.9526
16.1313	-1.04152	22.0124
16.1313	0.037	21.5302
17.2121	-29.083	18.9593
17.2121	-28.0045	19.0852
17.2121	-26.926	18.938
17.2121	-25.8474	18.8518
17.2121	-24.7689	19.0754
17.2121	-23.6904	18.9412
17.2121	-22.6119	18.946
17.2121	-21.5334	18.9699
17.2121	-20.4549	19.0124
17.2121	-19.3763	19.0358
17.2121	-18.2978	19.0657
17.2121	-17.2193	19.1319
17.2121	-16.1408	19.1964
17.2121	-15.0623	19.3399
17.2121	-13.9837	19.4734
17.2121	-12.9052	19.5426
17.2121	-11.8267	19.6326
17.2121	-10.7482	19.8464
17.2121	-9.66967	20.3215
17.2121	-8.59115	20.953
17.2121	-7.51263	21.2741
17.2121	-6.43411	21.5012
17.2121	-5.35559	21.9436
17.2121	-4.27707	22.7652
17.2121	-3.19856	23.0088
17.2121	-2.12004	23.0947
17.2121	-1.04152	23.1521
17.2121	0.037	23.1211
18.2929	-29.083	18.9156
18.2929	-28.0045	19.005
18.2929	-26.926	18.981
18.2929	-25.8474	19.1
18.2929	-24.7689	19.388
18.2929	-23.6904	19.3265
18.2929	-22.6119	19.4872
18.2929	-21.5334	19.567
18.2929	-20.4549	19.5979
18.2929	-19.3763	19.4806
18.2929	-18.2978	19.4757
18.2929	-17.2193	19.5826
18.2929	-16.1408	19.6317
18.2929	-15.0623	19.7472
18.2929	-13.9837	19.8212
18.2929	-12.9052	19.9305
18.2929	-11.8267	20.1541
18.2929	-10.7482	20.5664
18.2929	-9.66967	21.1874
18.2929	-8.59115	21.7699
18.2929	-7.51263	22.2481
18.2929	-6.43411	22.5727
18.2929	-5.35559	22.9807
18.2929	-4.27707	23.253
18.2929	-3.19856	23.4486
18.2929	-2.12004	23.9
18.2929	-1.04152	23.8
18.2929	0.037	23.9836
19.3737	-29.083	18.9504
19.3737	-28.0045	18.8673
19.3737	-26.926	19.1206
19.3737	-25.8474	19.2727
19.3737	-24.7689	19.5919
19.3737	-23.6904	19.7092
19.3737	-22.6119	20.0082
19.3737	-21.5334	20.2256
19.3737	-20.4549	20.3366
19.3737	-19.3763	20.299
19.3737	-18.2978	20.2967
19.3737	-17.2193	20.408
19.3737	-16.1408	20.4434
19.3737	-15.0623	20.4859
19.3737	-13.9837	20.5975
19.3737	-12.9052	20.6787
19.3737	-11.8267	20.8601
19.3737	-10.7482	21.0144
19.3737	-9.66967	21.3751
19.3737	-8.59115	21.7783
19.3737	-7.51263	22.2073
19.3737	-6.43411	22.6122
19.3737	-5.35559	22.6875
19.3737	-4.27707	22.8156
19.3737	-3.19856	23.0105
19.3737	-2.12004	23.0786
19.3737	-1.04152	23.1423
19.3737	0.037	23.1364
20.4545	-29.083	18.8982
20.4545	-28.0045	19.0216
20.4545	-26.926	19.2398
20.4545	-25.8474	19.4185
20.4545	-24.7689	19.8595
20.4545	-23.6904	20.0643
20.4545	-22.6119	20.4683
20.4545	-21.5334	20.8403
20.4545	-20.4549	21.0402
20.4545	-19.3763	21.1965
20.4545	-18.2978	21.2687
20.4545	-17.2193	21.3179
20.4545	-16.1408	21.337
20.4545	-15.0623	21.3688
20.4545	-13.9837	21.3931
20.4545	-12.9052	21.4607
20.4545	-11.8267	21.5382
20.4545	-10.7482	21.6747
20.4545	-9.66967	21.9119
20.4545	-8.59115	22.1331
20.4545	-7.51263	22.4331
20.4545	-6.43411	22.6495
20.4545	-5.35559	22.6976
20.4545	-4.27707	22.8073
20.4545	-3.19856	22.9482
20.4545	-2.12004	23.0242
20.4545	-1.04152	23.0863
20.4545	0.037	23.0416
21.5354	-29.083	18.9166
21.5354	-28.0045	18.9405
21.5354	-26.926	19.2096
21.5354	-25.8474	19.4393
21.5354	-24.7689	19.9234
21.5354	-23.6904	20.1359
21.5354	-22.6119	20.7466
21.5354	-21.5334	21.2245
21.5354	-20.4549	21.3212
21.5354	-19.3763	21.3219
21.5354	-18.2978	21.3221
21.5354	-17.2193	21.324
21.5354	-16.1408	21.3295
21.5354	-15.0623	21.3665
21.5354	-13.9837	21.3882
21.5354	-12.9052	21.4636
21.5354	-11.8267	21.5689
21.5354	-10.7482	21.7183
21.5354	-9.66967	21.8145
21.5354	-8.59115	22.004
21.5354	-7.51263	22.1875
21.5354	-6.43411	22.2753
21.5354	-5.35559	22.3469
21.5354	-4.27707	22.4053
21.5354	-3.19856	22.41
21.5354	-2.12004	22.4228
21.5354	-1.04152	22.442
21.5354	0.037	22.4211
22.6162	-29.083	18.7025
22.6162	-28.0045	18.8513
22.6162	-26.926	19.0787
22.6162	-25.8474	19.3613
22.6162	-24.7689	19.809
22.6162	-23.6904	19.8808
22.6162	-22.6119	20.4587
22.6162	-21.5334	20.8748
22.6162	-20.4549	20.8642
22.6162	-19.3763	20.8753
22.6162	-18.2978	20.8762
22.6162	-17.2193	20.8809
22.6162	-16.1408	20.8808
22.6162	-15.0623	20.8837
22.6162	-13.9837	20.8868
22.6162	-12.9052	20.9287
22.6162	-11.8267	20.9881
22.6162	-10.7482	21.0738
22.6162	-9.66967	21.1017
22.6162	-8.59115	21.1136
22.6162	-7.51263	21.151
22.6162	-6.43411	21.1999
22.6162	-5.35559	21.2981
22.6162	-4.27707	21.4406
22.6162	-3.19856	21.5856
22.6162	-2.12004	21.6379
22.6162	-1.04152	21.6566
22.6162	0.037	21.6198
23.697	-29.083	18.7592
23.697	-28.0045	18.9041
23.697	-26.926	19.0153
23.697	-25.8474	19.6467
23.697	-24.7689	19.5259
23.697	-23.6904	19.263
23.697	-22.6119	19.3376
23.697	-21.5334	19.3181
23.697	-20.4549	19.3198
23.697	-19.3763	19.3167
23.697	-18.2978	19.3117
23.697	-17.2193	19.3109
23.697	-16.1408	19.3154
23.697	-15.0623	19.3215
23.697	-13.9837	19.322
23.697	-12.9052	19.3221
23.697	-11.8267	19.3202
23.697	-10.7482	19.3268
23.697	-9.66967	19.3229
23.697	-8.59115	19.3221
23.697	-7.51263	19.3286
23.697	-6.43411	19.33
23.697	-5.35559	19.356
23.697	-4.27707	19.4689
23.697	-3.19856	19.6094
23.697	-2.12004	19.6615
23.697	-1.04152	19.6829
23.697	0.037	19.7512
24.7778	-29.083	19.5675
24.7778	-28.0045	19.5573
24.7778	-26.926	19.4862
24.7778	-25.8474	19.3605
24.7778	-24.7689	19.1175
24.7778	-23.6904	18.6767
24.7778	-22.6119	18.388
24.7778	-21.5334	18.1363
24.7778	-20.4549	18.1506
24.7778	-19.3763	18.1477
24.7778	-18.2978	18.1428
24.7778	-17.2193	18.1498
24.7778	-16.1408	18.1462
24.7778	-15.0623	18.1482
24.7778	-13.9837	18.147
24.7778	-12.9052	18.1502
24.7778	-11.8267	18.1636
24.7778	-10.7482	18.157
24.7778	-9.66967	18.1612
24.7778	-8.59115	18.1663
24.7778	-7.51263	18.1718
24.7778	-6.43411	18.1683
24.7778	-5.35559	18.1793
24.7778	-4.27707	18.2182
24.7778	-3.19856	18.264
24.7778	-2.12004	18.3101
24.7778	-1.04152	18.3572
24.7778	0.037	18.5525
25.8586	-29.083	19.6039
25.8586	-28.0045	19.5013
25.8586	-26.926	19.2839
25.8586	-25.8474	19.1289
25.8586	-24.7689	18.8637
25.8586	-23.6904	18.3434
25.8586	-22.6119	18.1524
25.8586	-21.5334	17.9758
25.8586	-20.4549	17.9709
25.8586	-19.3763	17.9868
25.8586	-18.2978	18.0516
25.8586	-17.2193	18.0934
25.8586	-16.1408	18.1241
25.8586	-15.0623	18.1537
25.8586	-13.9837	18.1711
25.8586	-12.9052	18.1778
25.8586	-11.8267	18.1862
25.8586	-10.7482	18.1822
25.8586	-9.66967	18.1813
25.8586	-8.59115	18.1824
25.8586	-7.51263	18.1857
25.8586	-6.43411	18.1995
25.8586	-5.35559	18.2321
25.8586	-4.27707	18.2757
25.8586	-3.19856	18.3027
25.8586	-2.12004	18.3346
25.8586	-1.04152	18.4247
25.8586	0.037	18.9651
26.9394	-29.083	18.9778
26.9394	-28.0045	19.484
26.9394	-26.926	19.1716
26.9394	-25.8474	19.0232
26.9394	-24.7689	18.8212
26.9394	-23.6904	18.2996
26.9394	-22.6119	18.284
26.9394	-21.5334	18.2806
26.9394	-20.4549	18.3275
26.9394	-19.3763	18.3604
26.9394	-18.2978	18.3897
26.9394	-17.2193	18.403
26.9394	-16.1408	18.407
26.9394	-15.0623	18.4289
26.9394	-13.9837	18.441
26.9394	-12.9052	18.4697
26.9394	-11.8267	18.4936
26.9394	-10.7482	18.5114
26.9394	-9.66967	18.5692
26.9394	-8.59115	18.5914
26.9394	-7.51263	18.6156
26.9394	-6.43411	18.6228
26.9394	-5.35559	18.7013
26.9394	-4.27707	18.8257
26.9394	-3.19856	18.9238
26.9394	-2.12004	19.3631
26.9394	-1.04152	19.6076
26.9394	0.037	19.7935
28.0202	-29.083	18.6328
28.0202	-28.0045	18.4458
28.0202	-26.926	18.6033
28.0202	-25.8474	18.5117
28.0202	-24.7689	18.5416
28.0202	-23.6904	18.2849
28.0202	-22.6119	18.4623
28.0202	-21.5334	18.6304
28.0202	-20.4549	18.8099
28.0202	-19.3763	18.8552
28.0202	-18.2978	18.8756
28.0202	-17.2193	18.8987
28.0202	-16.1408	18.9226
28.0202	-15.0623	18.9281
28.0202	-13.9837	18.9393
28.0202	-12.9052	18.9771
28.0202	-11.8267	19.065
28.0202	-10.7482	19.2457
28.0202	-9.66967	19.5796
28.0202	-8.59115	19.7654
28.0202	-7.51263	19.9858
28.0202	-6.43411	20.1396
28.0202	-5.35559	20.2284
28.0202	-4.27707	20.2604
28.0202	-3.19856	20.4121
28.0202	-2.12004	21.037
28.0202	-1.04152	21.4094
28.0202	0.037	21.4913
29.101	-29.083	18.5484
29.101	-28.0045	18.4555
29.101	-26.926	18.6214
29.101	-25.8474	18.322
29.101	-24.7689	18.413
29.101	-23.6904	18.3984
29.101	-22.6119	18.6318
29.101	-21.5334	18.9288
29.101	-20.4549	19.1934
29.101	-19.3763	19.4766
29.101	-18.2978	19.8428
29.101	-17.2193	19.9571
29.101	-16.1408	20.0158
29.101	-15.0623	20.053
29.101	-13.9837	20.0994
29.101	-12.9052	20.1778
29.101	-11.8267	20.2812
29.101	-10.7482	20.4253
29.101	-9.66967	20.6288
29.101	-8.59115	20.8769
29.101	-7.51263	21.2349
29.101	-6.43411	21.7702
29.101	-5.35559	22.0216
29.101	-4.27707	22.0561
29.101	-3.19856	22.3372
29.101	-2.12004	22.8411
29.101	-1.04152	23.8366
29.101	0.037	23.8954
30.1818	-29.083	18.5575
30.1818	-28.0045	18.417
30.1818	-26.926	18.3093
30.1818	-25.8474	18.3499
30.1818	-24.7689	18.5643
30.1818	-23.6904	18.5696
30.1818	-22.6119	18.8426
30.1818	-21.5334	19.1193
30.1818	-20.4549	19.5094
30.1818	-19.3763	19.9187
30.1818	-18.2978	20.2906
30.1818	-17.2193	20.5186
30.1818	-16.1408	20.5787
30.1818	-15.0623	20.6357
30.1818	-13.9837	20.7041
30.1818	-12.9052	20.7965
30.1818	-11.8267	20.8719
30.1818	-10.7482	20.9715
30.1818	-9.66967	21.1854
30.1818	-8.59115	21.4726
30.1818	-7.51263	22.1516
30.1818	-6.43411	22.7407
30.1818	-5.35559	22.9239
30.1818	-4.27707	23.0741
30.1818	-3.19856	23.1998
30.1818	-2.12004	23.3657
30.1818	-1.04152	23.5769
30.1818	0.037	23.5772
31.2626	-29.083	18.3795
31.2626	-28.0045	18.1383
31.2626	-26.926	18.3631
31.2626	-25.8474	18.3915
31.2626	-24.7689	18.5239
31.2626	-23.6904	18.6905
31.2626	-22.6119	18.9836
31.2626	-21.5334	19.3227
31.2626	-20.4549	19.7762
31.2626	-19.3763	20.2522
31.2626	-18.2978	20.7516
31.2626	-17.2193	21.1075
31.2626	-16.1408	21.2744
31.2626	-15.0623	21.3622
31.2626	-13.9837	21.3927
31.2626	-12.9052	21.4352
31.2626	-11.8267	21.4969
31.2626	-10.7482	21.6287
31.2626	-9.66967	21.7949
31.2626	-8.59115	22.231
31.2626	-7.51263	22.597
31.2626	-6.43411	22.698
31.2626	-5.35559	23.1796
31.2626	-4.27707	23.4475
31.2626	-3.19856	23.5214
31.2626	-2.12004	23.6358
31.2626	-1.04152	24.2026
31.2626	0.037	24.1975
32.3434	-29.083	18.0117
32.3434	-28.0045	18.0344
32.3434	-26.926	18.1923
32.3434	-25.8474	18.3545
32.3434	-24.7689	18.4948
32.3434	-23.6904	18.6686
32.3434	-22.6119	18.9923
32.3434	-21.5334	19.3971
32.3434	-20.4549	19.903
32.3434	-19.3763	20.4478
32.3434	-18.2978	21.1192
32.3434	-17.2193	21.7186
32.3434	-16.1408	21.9874
32.3434	-15.0623	22.0315
32.3434	-13.9837	22.0585
32.3434	-12.9052	22.0995
32.3434	-11.8267	22.1359
32.3434	-10.7482	22.2064
32.3434	-9.66967	22.3309
32.3434	-8.59115	22.5395
32.3434	-7.51263	22.702
32.3434	-6.43411	22.7889
32.3434	-5.35559	22.9558
32.3434	-4.27707	23.1376
32.3434	-3.19856	23.3306
32.3434	-2.12004	23.7317
32.3434	-1.04152	24.0139
32.3434	0.037	23.9869
33.4242	-29.083	17.8636
33.4242	-28.0045	17.894
33.4242	-26.926	17.9832
33.4242	-25.8474	18.0968
33.4242	-24.7689	18.3864
33.4242	-23.6904	18.5199
33.4242	-22.6119	18.9147
33.4242	-21.5334	19.3178
33.4242	-20.4549	19.8112
33.4242	-19.3763	20.393
33.4242	-18.2978	21.1722
33.4242	-17.2193	21.9629
33.4242	-16.1408	22.1909
33.4242	-15.0623	22.1826
33.4242	-13.9837	22.1955
33.4242	-12.9052	22.2362
33.4242	-11.8267	22.291
33.4242	-10.7482	22.3765
33.4242	-9.66967	22.4566
33.4242	-8.59115	22.5377
33.4242	-7.51263	22.6021
33.4242	-6.43411	22.6262
33.4242	-5.35559	22.6474
33.4242	-4.27707	22.7029
33.4242	-3.19856	22.9019
33.4242	-2.12004	23.304
33.4242	-1.04152	23.4801
33.4242	0.037	23.4649
34.5051	-29.083	17.4603
34.5051	-28.0045	17.5377
34.5051	-26.926	17.8346
34.5051	-25.8474	17.9473
34.5051	-24.7689	18.1719
34.5051	-23.6904	18.3595
34.5051	-22.6119	18.6907
34.5051	-21.5334	19.0062
34.5051	-20.4549	19.4492
34.5051	-19.3763	19.9726
34.5051	-18.2978	20.6498
34.5051	-17.2193	21.37
34.5051	-16.1408	21.5027
34.5051	-15.0623	21.4882
34.5051	-13.9837	21.4853
34.5051	-12.9052	21.4951
34.5051	-11.8267	21.5479
34.5051	-10.7482	21.6173
34.5051	-9.66967	21.6576
34.5051	-8.59115	21.684
34.5051	-7.51263	21.7125
34.5051	-6.43411	21.7101
34.5051	-5.35559	21.7156
34.5051	-4.27707	21.7152
34.5051	-3.19856	21.9202
34.5051	-2.12004	22.1968
34.5051	-1.04152	22.3511
34.5051	0.037	22.3656
35.5859	-29.083	17.4172
35.5859	-28.0045	17.4429
35.5859	-26.926	17.6746
35.5859	-25.8474	17.7792
35.5859	-24.7689	17.9272
35.5859	-23.6904	18.1481
35.5859	-22.6119	18.4226
35.5859	-21.5334	18.6413
35.5859	-20.4549	18.8934
35.5859	-19.3763	19.1977
35.5859	-18.2978	19.5969
35.5859	-17.2193	20.0017
35.5859	-16.1408	20.1694
35.5859	-15.0623	20.1836
35.5859	-13.9837	20.181
35.5859	-12.9052	20.178
35.5859	-11.8267	20.1841
35.5859	-10.7482	20.1808
35.5859	-9.66967	20.1796
35.5859	-8.59115	20.1796
35.5859	-7.51263	20.1991
35.5859	-6.43411	20.2186
35.5859	-5.35559	20.2423
35.5859	-4.27707	20.2983
35.5859	-3.19856	20.6377
35.5859	-2.12004	20.8926
35.5859	-1.04152	20.9879
35.5859	0.037	21.0345
36.6667	-29.083	17.7234
36.6667	-28.0045	17.3927
36.6667	-26.926	17.6266
36.6667	-25.8474	17.5648
36.6667	-24.7689	17.6251
36.6667	-23.6904	17.7626
36.6667	-22.6119	18.0531
36.6667	-21.5334	18.0822
36.6667	-20.4549	18.1283
36.6667	-19.3763	18.2104
36.6667	-18.2978	18.2969
36.6667	-17.2193	18.3776
36.6667	-16.1408	18.4426
36.6667	-15.0623	18.454
36.6667	-13.9837	18.4605
36.6667	-12.9052	18.4579
36.6667	-11.8267	18.4655
36.6667	-10.7482	18.4694
36.6667	-9.66967	18.463
36.6667	-8.59115	18.4777
36.6667	-7.51263	18.49
36.6667	-6.43411	18.5102
36.6667	-5.35559	18.5438
36.6667	-4.27707	18.5956
36.6667	-3.19856	18.7456
36.6667	-2.12004	18.8163
36.6667	-1.04152	18.8306
36.6667	0.037	18.985
37.7475	-29.083	17.8563
37.7475	-28.0045	17.8268
37.7475	-26.926	17.7318
37.7475	-25.8474	17.7038
37.7475	-24.7689	17.3256
37.7475	-23.6904	16.9225
37.7475	-22.6119	16.9782
37.7475	-21.5334	16.9892
37.7475	-20.4549	16.9986
37.7475	-19.3763	17.0632
37.7475	-18.2978	17.0795
37.7475	-17.2193	17.1144
37.7475	-16.1408	17.1132
37.7475	-15.0623	17.1107
37.7475	-13.9837	17.1442
37.7475	-12.9052	17.123
37.7475	-11.8267	17.1556
37.7475	-10.7482	17.1987
37.7475	-9.66967	17.2301
37.7475	-8.59115	17.2739
37.7475	-7.51263	17.3544
37.7475	-6.43411	17.472
37.7475	-5.35559	17.622
37.7475	-4.27707	17.78
37.7475	-3.19856	17.8343
37.7475	-2.12004	17.8858
37.7475	-1.04152	17.9099
37.7475	0.037	18.0713
38.8283	-29.083	18.1334
38.8283	-28.0045	17.9906
38.8283	-26.926	17.8343
38.8283	-25.8474	17.5809
38.8283	-24.7689	17.3058
38.8283	-23.6904	17.074
38.8283	-22.6119	16.9973
38.8283	-21.5334	16.9968
38.8283	-20.4549	17.0133
38.8283	-19.3763	17.0331
38.8283	-18.2978	17.0434
38.8283	-17.2193	17.0537
38.8283	-16.1408	17.065
38.8283	-15.0623	17.1139
38.8283	-13.9837	17.1508
38.8283	-12.9052	17.1914
38.8283	-11.8267	17.237
38.8283	-10.7482	17.3444
38.8283	-9.66967	17.5212
38.8283	-8.59115	17.6593
38.8283	-7.51263	17.9378
38.8283	-6.43411	18.3259
38.8283	-5.35559	18.677
38.8283	-4.27707	19.0196
38.8283	-3.19856	19.2191
38.8283	-2.12004	19.3717
38.8283	-1.04152	19.4276
38.8283	0.037	19.5321
39.9091	-29.083	18.2265
39.9091	-28.0045	18.0179
39.9091	-26.926	17.9232
39.9091	-25.8474	17.7075
39.9091	-24.7689	17.5119
39.9091	-23.6904	17.4463
39.9091	-22.6119	17.4421
39.9091	-21.5334	17.446
39.9091	-20.4549	17.4568
39.9091	-19.3763	17.4636
39.9091	-18.2978	17.4674
39.9091	-17.2193	17.53
39.9091	-16.1408	17.5783
39.9091	-15.0623	17.6116
39.9091	-13.9837	17.7448
39.9091	-12.9052	17.8579
39.9091	-11.8267	18.0739
39.9091	-10.7482	18.5828
39.9091	-9.66967	18.6268
39.9091	-8.59115	18.7464
39.9091	-7.51263	18.9794
39.9091	-6.43411	19.3248
39.9091	-5.35559	20.1947
39.9091	-4.27707	20.6418
39.9091	-3.19856	21.4021
39.9091	-2.12004	21.6386
39.9091	-1.04152	21.732
39.9091	0.037	21.7462
40.9899	-29.083	18.257
40.9899	-28.0045	18.187
40.9899	-26.926	18.0781
40.9899	-25.8474	17.9649
40.9899	-24.7689	17.7699
40.9899	-23.6904	17.6969
40.9899	-22.6119	17.7137
40.9899	-21.5334	17.7252
40.9899	-20.4549	17.7253
40.9899	-19.3763	17.736
40.9899	-18.2978	17.762
40.9899	-17.2193	17.8154
40.9899	-16.1408	17.915
40.9899	-15.0623	18.0078
40.9899	-13.9837	18.1069
40.9899	-12.9052	18.306
40.9899	-11.8267	18.7593
40.9899	-10.7482	19.0951
40.9899	-9.66967	19.4059
40.9899	-8.59115	19.7408
40.9899	-7.51263	20.3532
40.9899	-6.43411	20.9857
40.9899	-5.35559	21.2724
40.9899	-4.27707	21.4352
40.9899	-3.19856	21.7651
40.9899	-2.12004	22.1558
40.9899	-1.04152	22.424
40.9899	0.037	22.5905
42.0707	-29.083	18.2718
42.0707	-28.0045	18.2748
42.0707	-26.926	18.2789
42.0707	-25.8474	18.2972
42.0707	-24.7689	18.1752
42.0707	-23.6904	17.9824
42.0707	-22.6119	17.9748
42.0707	-21.5334	17.9971
42.0707	-20.4549	18.0137
42.0707	-19.3763	18.0457
42.0707	-18.2978	18.0812
42.0707	-17.2193	18.1375
42.0707	-16.1408	18.2335
42.0707	-15.0623	18.3259
42.0707	-13.9837	18.4371
42.0707	-12.9052	18.6129
42.0707	-11.8267	18.99
42.0707	-10.7482	19.5527
42.0707	-9.66967	20.0748
42.0707	-8.59115	20.6264
42.0707	-7.51263	21.3713
42.0707	-6.43411	22.3026
42.0707	-5.35559	22.7228
42.0707	-4.27707	22.9162
42.0707	-3.19856	22.9781
42.0707	-2.12004	23.3838
42.0707	-1.04152	24.2271
42.0707	0.037	24.2511
43.1515	-29.083	18.4248
43.1515	-28.0045	18.4917
43.1515	-26.926	18.506
43.1515	-25.8474	18.64
43.1515	-24.7689	18.525
43.1515	-23.6904	18.4316
43.1515	-22.6119	18.4528
43.1515	-21.5334	18.5361
43.1515	-20.4549	18.602
43.1515	-19.3763	18.7117
43.1515	-18.2978	18.7728
43.1515	-17.2193	18.8735
43.1515	-16.1408	19.0255
43.1515	-15.0623	19.3755
43.1515	-13.9837	19.634
43.1515	-12.9052	19.8422
43.1515	-11.8267	20.0565
43.1515	-10.7482	20.4017
43.1515	-9.66967	20.9307
43.1515	-8.59115	21.5822
43.1515	-7.51263	22.28
43.1515	-6.43411	22.837
43.1515	-5.35559	23.1514
43.1515	-4.27707	23.3323
43.1515	-3.19856	23.3778
43.1515	-2.12004	23.5011
43.1515	-1.04152	23.7091
43.1515	0.037	23.5894
44.2323	-29.083	18.6416
44.2323	-28.0045	18.6439
44.2323	-26.926	18.5675
44.2323	-25.8474	18.6117
44.2323	-24.7689	18.6149
44.2323	-23.6904	18.5965
44.2323	-22.6119	18.6423
44.2323	-21.5334	18.76
44.2323	-20.4549	18.8682
44.2323	-19.3763	18.9931
44.2323	-18.2978	19.0897
44.2323	-17.2193	19.228
44.2323	-16.1408	19.4687
44.2323	-15.0623	19.8914
44.2323	-13.9837	20.1657
44.2323	-12.9052	20.4087
44.2323	-11.8267	20.6626
44.2323	-10.7482	20.9752
44.2323	-9.66967	21.3718
44.2323	-8.59115	21.8607
44.2323	-7.51263	22.4776
44.2323	-6.43411	22.9322
44.2323	-5.35559	23.2607
44.2323	-4.27707	23.4328
44.2323	-3.19856	23.4966
44.2323	-2.12004	23.529
44.2323	-1.04152	23.5149
44.2323	0.037	23.3956
45.3131	-29.083	18.774
45.3131	-28.0045	18.9426
45.3131	-26.926	18.8351
45.3131	-25.8474	18.898
45.3131	-24.7689	18.9706
45.3131	-23.6904	18.9634
45.3131	-22.6119	19.0083
45.3131	-21.5334	19.1218
45.3131	-20.4549	19.2316
45.3131	-19.3763	19.3624
45.3131	-18.2978	19.4421
45.3131	-17.2193	19.5482
45.3131	-16.1408	19.7228
45.3131	-15.0623	20.2547
45.3131	-13.9837	20.4269
45.3131	-12.9052	20.6098
45.3131	-11.8267	20.7929
45.3131	-10.7482	20.9647
45.3131	-9.66967	21.1659
45.3131	-8.59115	21.4342
45.3131	-7.51263	21.9054
45.3131	-6.43411	22.1629
45.3131	-5.35559	22.4456
45.3131	-4.27707	22.596
45.3131	-3.19856	22.7151
45.3131	-2.12004	22.8007
45.3131	-1.04152	22.8214
45.3131	0.037	22.7883
46.3939	-29.083	18.8312
46.3939	-28.0045	19.0749
46.3939	-26.926	19.14
46.3939	-25.8474	19.1647
46.3939	-24.7689	19.2177
46.3939	-23.6904	19.209
46.3939	-22.6119	19.2485
46.3939	-21.5334	19.2792
46.3939	-20.4549	19.3603
46.3939	-19.3763	19.4262
46.3939	-18.2978	19.4941
46.3939	-17.2193	19.5242
46.3939	-16.1408	19.6869
46.3939	-15.0623	19.9512
46.3939	-13.9837	20.0364
46.3939	-12.9052	20.1033
46.3939	-11.8267	20.1236
46.3939	-10.7482	20.1216
46.3939	-9.66967	20.1819
46.3939	-8.59115	20.3288
46.3939	-7.51263	20.4474
46.3939	-6.43411	20.5533
46.3939	-5.35559	20.6949
46.3939	-4.27707	20.8172
46.3939	-3.19856	21.0028
46.3939	-2.12004	21.2442
46.3939	-1.04152	21.3951
46.3939	0.037	21.422
47.4747	-29.083	18.6117
47.4747	-28.0045	18.6604
47.4747	-26.926	18.5976
47.4747	-25.8474	18.5634
47.4747	-24.7689	18.5546
47.4747	-23.6904	18.5673
47.4747	-22.6119	18.5692
47.4747	-21.5334	18.5879
47.4747	-20.4549	18.6064
47.4747	-19.3763	18.6372
47.4747	-18.2978	18.6414
47.4747	-17.2193	18.6928
47.4747	-16.1408	18.7748
47.4747	-15.0623	18.7855
47.4747	-13.9837	18.8107
47.4747	-12.9052	18.8359
47.4747	-11.8267	18.8249
47.4747	-10.7482	18.8497
47.4747	-9.66967	18.8903
47.4747	-8.59115	18.9258
47.4747	-7.51263	18.9733
47.4747	-6.43411	19.0779
47.4747	-5.35559	19.1804
47.4747	-4.27707	19.2562
47.4747	-3.19856	19.3765
47.4747	-2.12004	19.5029
47.4747	-1.04152	19.5116
47.4747	0.037	19.7797
48.5556	-29.083	18.3346
48.5556	-28.0045	18.2077
48.5556	-26.926	17.9678
48.5556	-25.8474	17.81
48.5556	-24.7689	17.7751
48.5556	-23.6904	17.7444
48.5556	-22.6119	17.7466
48.5556	-21.5334	17.7622
48.5556	-20.4549	17.7497
48.5556	-19.3763	17.7603
48.5556	-18.2978	17.7597
48.5556	-17.2193	17.7549
48.5556	-16.1408	17.7493
48.5556	-15.0623	17.7432
48.5556	-13.9837	17.7434
48.5556	-12.9052	17.7404
48.5556	-11.8267	17.7577
48.5556	-10.7482	17.7508
48.5556	-9.66967	17.7468
48.5556	-8.59115	17.7479
48.5556	-7.51263	17.7535
48.5556	-6.43411	17.7939
48.5556	-5.35559	17.8462
48.5556	-4.27707	17.9862
48.5556	-3.19856	18.1588
48.5556	-2.12004	18.1725
48.5556	-1.04152	18.1323
48.5556	0.037	18.5082
49.6364	-29.083	18.1125
49.6364	-28.0045	17.8775
49.6364	-26.926	17.506
49.6364	-25.8474	17.1578
49.6364	-24.7689	17.121
49.6364	-23.6904	17.1014
49.6364	-22.6119	17.1059
49.6364	-21.5334	17.1208
49.6364	-20.4549	17.1198
49.6364	-19.3763	17.134
49.6364	-18.2978	17.1374
49.6364	-17.2193	17.1519
49.6364	-16.1408	17.1609
49.6364	-15.0623	17.1772
49.6364	-13.9837	17.2274
49.6364	-12.9052	17.3006
49.6364	-11.8267	17.3316
49.6364	-10.7482	17.347
49.6364	-9.66967	17.3584
49.6364	-8.59115	17.3576
49.6364	-7.51263	17.3752
49.6364	-6.43411	17.4141
49.6364	-5.35559	17.462
49.6364	-4.27707	17.6209
49.6364	-3.19856	17.9625
49.6364	-2.12004	18.3519
49.6364	-1.04152	18.649
49.6364	0.037	18.9352
50.7172	-29.083	18.0721
50.7172	-28.0045	17.8312
50.7172	-26.926	17.4653
50.7172	-25.8474	17.1828
50.7172	-24.7689	17.1603
50.7172	-23.6904	17.1723
50.7172	-22.6119	17.1875
50.7172	-21.5334	17.2076
50.7172	-20.4549	17.2104
50.7172	-19.3763	17.2143
50.7172	-18.2978	17.2154
50.7172	-17.2193	17.2537
50.7172	-16.1408	17.2693
50.7172	-15.0623	17.3309
50.7172	-13.9837	17.4387
50.7172	-12.9052	17.5011
50.7172	-11.8267	17.5342
50.7172	-10.7482	17.7089
50.7172	-9.66967	17.9982
50.7172	-8.59115	18.2259
50.7172	-7.51263	18.4533
50.7172	-6.43411	18.582
50.7172	-5.35559	18.6353
50.7172	-4.27707	18.7287
50.7172	-3.19856	18.9028
50.7172	-2.12004	19.3558
50.7172	-1.04152	19.66
50.7172	0.037	19.8492
51.798	-29.083	18.4372
51.798	-28.0045	18.0836
51.798	-26.926	17.8006
51.798	-25.8474	17.6006
51.798	-24.7689	17.5742
51.798	-23.6904	17.6085
51.798	-22.6119	17.6337
51.798	-21.5334	17.656
51.798	-20.4549	17.6685
51.798	-19.3763	17.6955
51.798	-18.2978	17.7329
51.798	-17.2193	17.753
51.798	-16.1408	17.8373
51.798	-15.0623	17.9052
51.798	-13.9837	18.0284
51.798	-12.9052	18.1143
51.798	-11.8267	18.4821
51.798	-10.7482	18.8602
51.798	-9.66967	18.9712
51.798	-8.59115	19.1691
51.798	-7.51263	19.5656
51.798	-6.43411	20.0789
51.798	-5.35559	20.3063
51.798	-4.27707	20.3296
51.798	-3.19856	20.4308
51.798	-2.12004	20.7752
51.798	-1.04152	21.7164
51.798	0.037	21.9565
52.8788	-29.083	18.4991
52.8788	-28.0045	18.3576
52.8788	-26.926	18.1959
52.8788	-25.8474	18.0095
52.8788	-24.7689	17.9623
52.8788	-23.6904	17.9739
52.8788	-22.6119	17.9894
52.8788	-21.5334	18.0015
52.8788	-20.4549	18.023
52.8788	-19.3763	18.0643
52.8788	-18.2978	18.1007
52.8788	-17.2193	18.0992
52.8788	-16.1408	18.1173
52.8788	-15.0623	18.2104
52.8788	-13.9837	18.2788
52.8788	-12.9052	18.3165
52.8788	-11.8267	18.6184
52.8788	-10.7482	19.6361
52.8788	-9.66967	20.0785
52.8788	-8.59115	20.5318
52.8788	-7.51263	20.951
52.8788	-6.43411	21.7071
52.8788	-5.35559	22.2124
52.8788	-4.27707	22.2669
52.8788	-3.19856	22.3826
52.8788	-2.12004	22.6116
52.8788	-1.04152	23.0545
52.8788	0.037	24.1597
53.9596	-29.083	18.7966
53.9596	-28.0045	18.6116
53.9596	-26.926	18.6212
53.9596	-25.8474	18.4611
53.9596	-24.7689	18.3738
53.9596	-23.6904	18.3078
53.9596	-22.6119	18.3449
53.9596	-21.5334	18.3823
53.9596	-20.4549	18.385
53.9596	-19.3763	18.4168
53.9596	-18.2978	18.5531
53.9596	-17.2193	18.6766
53.9596	-16.1408	18.6979
53.9596	-15.0623	18.6969
53.9596	-13.9837	18.7127
53.9596	-12.9052	18.7544
53.9596	-11.8267	18.8977
53.9596	-10.7482	19.5342
53.9596	-9.66967	20.5111
53.9596	-8.59115	22.1683
53.9596	-7.51263	22.5425
53.9596	-6.43411	22.7752
53.9596	-5.35559	22.8708
53.9596	-4.27707	22.9077
53.9596	-3.19856	23.011
53.9596	-2.12004	23.5465
53.9596	-1.04152	23.9345
53.9596	0.037	24.0824
55.0404	-29.083	18.6328
55.0404	-28.0045	18.7635
55.0404	-26.926	19.0748
55.0404	-25.8474	18.9779
55.0404	-24.7689	18.9183
55.0404	-23.6904	18.8205
55.0404	-22.6119	18.8654
55.0404	-21.5334	18.9818
55.0404	-20.4549	19.0338
55.0404	-19.3763	19.0541
55.0404	-18.2978	19.1473
55.0404	-17.2193	19.1607
55.0404	-16.1408	19.3203
55.0404	-15.0623	19.3792
55.0404	-13.9837	19.5653
55.0404	-12.9052	20.4911
55.0404	-11.8267	20.7775
55.0404	-10.7482	20.9281
55.0404	-9.66967	21.4499
55.0404	-8.59115	22.161
55.0404	-7.51263	22.5142
55.0404	-6.43411	22.5702
55.0404	-5.35559	22.6258
55.0404	-4.27707	22.6722
55.0404	-3.19856	22.6995
55.0404	-2.12004	22.7417
55.0404	-1.04152	23.1389
55.0404	0.037	23.2109
56.1212	-29.083	18.8419
56.1212	-28.0045	19.1258
56.1212	-26.926	19.4379
56.1212	-25.8474	19.5735
56.1212	-24.7689	19.5926
56.1212	-23.6904	19.4722
56.1212	-22.6119	19.4405
56.1212	-21.5334	19.5839
56.1212	-20.4549	19.7033
56.1212	-19.3763	19.7412
56.1212	-18.2978	19.7623
56.1212	-17.2193	19.9115
56.1212	-16.1408	20.0204
56.1212	-15.0623	20.0958
56.1212	-13.9837	20.4008
56.1212	-12.9052	20.7264
56.1212	-11.8267	21.139
56.1212	-10.7482	21.3282
56.1212	-9.66967	21.5138
56.1212	-8.59115	21.9788
56.1212	-7.51263	22.6009
56.1212	-6.43411	22.8433
56.1212	-5.35559	23.0401
56.1212	-4.27707	23.1918
56.1212	-3.19856	23.301
56.1212	-2.12004	23.3493
56.1212	-1.04152	23.3876
56.1212	0.037	23.3831
57.202	-29.083	19.0373
57.202	-28.0045	19.3887
57.202	-26.926	19.7959
57.202	-25.8474	20.1297
57.202	-24.7689	20.21
57.202	-23.6904	20.207
57.202	-22.6119	20.2418
57.202	-21.5334	20.3261
57.202	-20.4549	20.4469
57.202	-19.3763	20.4887
57.202	-18.2978	20.5163
57.202	-17.2193	20.5158
57.202	-16.1408	20.5422
57.202	-15.0623	20.6081
57.202	-13.9837	20.7159
57.202	-12.9052	20.8549
57.202	-11.8267	20.9834
57.202	-10.7482	21.1755
57.202	-9.66967	21.5152
57.202	-8.59115	22.1794
57.202	-7.51263	22.3752
57.202	-6.43411	22.3775
57.202	-5.35559	22.3848
57.202	-4.27707	22.4213
57.202	-3.19856	22.6521
57.202	-2.12004	22.8245
57.202	-1.04152	22.942
57.202	0.037	22.9494
58.2828	-29.083	19.0662
58.2828	-28.0045	19.4455
58.2828	-26.926	19.8576
58.2828	-25.8474	20.3253
58.2828	-24.7689	20.4027
58.2828	-23.6904	20.4089
58.2828	-22.6119	20.4078
58.2828	-21.5334	20.4154
58.2828	-20.4549	20.4434
58.2828	-19.3763	20.4717
58.2828	-18.2978	20.4862
58.2828	-17.2193	20.4985
58.2828	-16.1408	20.6097
58.2828	-15.0623	20.7633
58.2828	-13.9837	20.7914
58.2828	-12.9052	20.8937
58.2828	-11.8267	21.0853
58.2828	-10.7482	21.2177
58.2828	-9.66967	21.2331
58.2828	-8.59115	21.2672
58.2828	-7.51263	21.284
58.2828	-6.43411	21.2943
58.2828	-5.35559	21.3261
58.2828	-4.27707	21.3969
58.2828	-3.19856	21.5757
58.2828	-2.12004	21.7704
58.2828	-1.04152	21.9486
58.2828	0.037	22.0147
59.3636	-29.083	18.9803
59.3636	-28.0045	19.3106
59.3636	-26.926	19.4803
59.3636	-25.8474	19.755
59.3636	-24.7689	19.9325
59.3636	-23.6904	19.9415
59.3636	-22.6119	19.9321
59.3636	-21.5334	19.9378
59.3636	-20.4549	19.9494
59.3636	-19.3763	19.9537
59.3636	-18.2978	19.9668
59.3636	-17.2193	19.9705
59.3636	-16.1408	20.0077
59.3636	-15.0623	20.0195
59.3636	-13.9837	20.0167
59.3636	-12.9052	20.0112
59.3636	-11.8267	20.003
59.3636	-10.7482	20.0051
59.3636	-9.66967	19.9968
59.3636	-8.59115	20.0023
59.3636	-7.51263	20.0236
59.3636	-6.43411	20.027
59.3636	-5.35559	20.0499
59.3636	-4.27707	20.184
59.3636	-3.19856	20.3166
59.3636	-2.12004	20.5861
59.3636	-1.04152	20.7946
59.3636	0.037	20.8567
60.4444	-29.083	19.0265
60.4444	-28.0045	19.0025
60.4444	-26.926	18.8337
60.4444	-25.8474	18.7051
60.4444	-24.7689	18.7878
60.4444	-23.6904	18.7435
60.4444	-22.6119	18.7529
60.4444	-21.5334	18.7419
60.4444	-20.4549	18.7534
60.4444	-19.3763	18.7655
60.4444	-18.2978	18.7558
60.4444	-17.2193	18.7719
60.4444	-16.1408	18.7687
60.4444	-15.0623	18.7661
60.4444	-13.9837	18.7702
60.4444	-12.9052	18.7706
60.4444	-11.8267	18.7669
60.4444	-10.7482	18.7733
60.4444	-9.66967	18.7646
60.4444	-8.59115	18.7618
60.4444	-7.51263	18.7781
60.4444	-6.43411	18.7858
60.4444	-5.35559	18.7887
60.4444	-4.27707	18.915
60.4444	-3.19856	19.1081
60.4444	-2.12004	19.2904
60.4444	-1.04152	19.3745
60.4444	0.037	19.4843
61.5253	-29.083	18.8713
61.5253	-28.0045	18.7169
61.5253	-26.926	18.3809
61.5253	-25.8474	18.0377
61.5253	-24.7689	17.9801
61.5253	-23.6904	17.9597
61.5253	-22.6119	17.9708
61.5253	-21.5334	17.9813
61.5253	-20.4549	17.9529
61.5253	-19.3763	17.9358
61.5253	-18.2978	17.9221
61.5253	-17.2193	17.9303
61.5253	-16.1408	17.9324
61.5253	-15.0623	17.93
61.5253	-13.9837	17.9334
61.5253	-12.9052	17.9379
61.5253	-11.8267	17.9395
61.5253	-10.7482	17.9602
61.5253	-9.66967	17.9541
61.5253	-8.59115	17.9352
61.5253	-7.51263	17.9575
61.5253	-6.43411	17.9617
61.5253	-5.35559	17.9781
61.5253	-4.27707	17.9789
61.5253	-3.19856	18.1875
61.5253	-2.12004	18.4744
61.5253	-1.04152	18.6318
61.5253	0.037	18.8024
62.6061	-29.083	19.0448
62.6061	-28.0045	18.7761
62.6061	-26.926	18.3599
62.6061	-25.8474	18.0567
62.6061	-24.7689	17.9725
62.6061	-23.6904	17.9684
62.6061	-22.6119	17.9682
62.6061	-21.5334	17.9761
62.6061	-20.4549	17.9504
62.6061	-19.3763	17.9367
62.6061	-18.2978	17.9288
62.6061	-17.2193	17.9359
62.6061	-16.1408	17.9531
62.6061	-15.0623	17.9573
62.6061	-13.9837	17.9991
62.6061	-12.9052	18.0298
62.6061	-11.8267	18.0726
62.6061	-10.7482	18.1447
62.6061	-9.66967	18.1643
62.6061	-8.59115	18.6302
62.6061	-7.51263	19.2774
62.6061	-6.43411	19.3522
62.6061	-5.35559	19.4186
62.6061	-4.27707	19.4779
62.6061	-3.19856	19.6375
62.6061	-2.12004	20.1495
62.6061	-1.04152	20.3455
62.6061	0.037	20.3843
63.6869	-29.083	19.1383
63.6869	-28.0045	18.891
63.6869	-26.926	18.5755
63.6869	-25.8474	18.4011
63.6869	-24.7689	18.3376
63.6869	-23.6904	18.4213
63.6869	-22.6119	18.486
63.6869	-21.5334	18.4996
63.6869	-20.4549	18.5174
63.6869	-19.3763	18.5509
63.6869	-18.2978	18.5691
63.6869	-17.2193	18.5796
63.6869	-16.1408	18.5994
63.6869	-15.0623	18.6607
63.6869	-13.9837	18.753
63.6869	-12.9052	18.8659
63.6869	-11.8267	18.9507
63.6869	-10.7482	19.2205
63.6869	-9.66967	19.4816
63.6869	-8.59115	19.9165
63.6869	-7.51263	20.3352
63.6869	-6.43411	20.4088
63.6869	-5.35559	20.5108
63.6869	-4.27707	20.6561
63.6869	-3.19856	20.7971
63.6869	-2.12004	20.9686
63.6869	-1.04152	21.034
63.6869	0.037	21.1043
64.7677	-29.083	19.0988
64.7677	-28.0045	18.9798
64.7677	-26.926	18.8407
64.7677	-25.8474	18.8695
64.7677	-24.7689	18.8993
64.7677	-23.6904	19.0563
64.7677	-22.6119	19.2885
64.7677	-21.5334	19.4516
64.7677	-20.4549	19.4628
64.7677	-19.3763	19.4816
64.7677	-18.2978	19.5424
64.7677	-17.2193	19.5581
64.7677	-16.1408	19.6129
64.7677	-15.0623	19.6741
64.7677	-13.9837	19.7526
64.7677	-12.9052	19.9143
64.7677	-11.8267	20.2252
64.7677	-10.7482	20.4915
64.7677	-9.66967	20.7532
64.7677	-8.59115	21.0811
64.7677	-7.51263	21.4283
64.7677	-6.43411	21.6061
64.7677	-5.35559	22.3763
64.7677	-4.27707	22.7575
64.7677	-3.19856	22.966
64.7677	-2.12004	23.5121
64.7677	-1.04152	23.6374
64.7677	0.037	23.6455
65.8485	-29.083	19.2071
65.8485	-28.0045	19.2283
65.8485	-26.926	19.1995
65.8485	-25.8474	19.3411
65.8485	-24.7689	19.4297
65.8485	-23.6904	19.5911
65.8485	-22.6119	19.8108
65.8485	-21.5334	19.9671
65.8485	-20.4549	19.9984
65.8485	-19.3763	20.0329
65.8485	-18.2978	20.1816
65.8485	-17.2193	20.2461
65.8485	-16.1408	20.2721
65.8485	-15.0623	20.2911
65.8485	-13.9837	20.3113
65.8485	-12.9052	20.3711
65.8485	-11.8267	20.5617
65.8485	-10.7482	20.9846
65.8485	-9.66967	21.3394
65.8485	-8.59115	21.7993
65.8485	-7.51263	22.2336
65.8485	-6.43411	22.5529
65.8485	-5.35559	22.8443
65.8485	-4.27707	23.1913
65.8485	-3.19856	23.3777
65.8485	-2.12004	23.5156
65.8485	-1.04152	23.5577
65.8485	0.037	23.5256
66.9293	-29.083	19.4108
66.9293	-28.0045	19.5271
66.9293	-26.926	19.5845
66.9293	-25.8474	19.7724
66.9293	-24.7689	19.8951
66.9293	-23.6904	20.041
66.9293	-22.6119	20.1596
66.9293	-21.5334	20.2152
66.9293	-20.4549	20.2224
66.9293	-19.3763	20.263
66.9293	-18.2978	20.3648
66.9293	-17.2193	20.4435
66.9293	-16.1408	20.464
66.9293	-15.0623	20.4674
66.9293	-13.9837	20.4705
66.9293	-12.9052	20.4906
66.9293	-11.8267	20.6359
66.9293	-10.7482	20.9697
66.9293	-9.66967	21.382
66.9293	-8.59115	21.8227
66.9293	-7.51263	22.1494
66.9293	-6.43411	22.4717
66.9293	-5.35559	22.8601
66.9293	-4.27707	23.14
66.9293	-3.19856	23.2544
66.9293	-2.12004	23.2995
66.9293	-1.04152	23.3284
66.9293	0.037	23.3445
68.0101	-29.083	19.5366
68.0101	-28.0045	19.7759
68.0101	-26.926	19.8952
68.0101	-25.8474	20.1508
68.0101	-24.7689	20.3212
68.0101	-23.6904	20.4635
68.0101	-22.6119	20.5181
68.0101	-21.5334	20.474
68.0101	-20.4549	20.4324
68.0101	-19.3763	20.4555
68.0101	-18.2978	20.5103
68.0101	-17.2193	20.5711
68.0101	-16.1408	20.5856
68.0101	-15.0623	20.5843
68.0101	-13.9837	20.6183
68.0101	-12.9052	20.6326
68.0101	-11.8267	20.7048
68.0101	-10.7482	20.9698
68.0101	-9.66967	21.3793
68.0101	-8.59115	21.8295
68.0101	-7.51263	22.0301
68.0101	-6.43411	22.3168
68.0101	-5.35559	23.0712
68.0101	-4.27707	23.3323
68.0101	-3.19856	23.3344
68.0101	-2.12004	23.4272
68.0101	-1.04152	23.4667
68.0101	0.037	23.4901
69.0909	-29.083	19.5788
69.0909	-28.0045	19.869
69.0909	-26.926	20.0637
69.0909	-25.8474	20.409
69.0909	-24.7689	20.6687
69.0909	-23.6904	20.856
69.0909	-22.6119	20.8956
69.0909	-21.5334	20.8963
69.0909	-20.4549	20.9002
69.0909	-19.3763	20.9192
69.0909	-18.2978	20.9517
69.0909	-17.2193	20.9999
69.0909	-16.1408	21.0308
69.0909	-15.0623	21.0459
69.0909	-13.9837	21.0892
69.0909	-12.9052	21.1992
69.0909	-11.8267	21.2146
69.0909	-10.7482	21.3869
69.0909	-9.66967	21.8445
69.0909	-8.59115	22.1918
69.0909	-7.51263	22.469
69.0909	-6.43411	22.7587
69.0909	-5.35559	23.1446
69.0909	-4.27707	23.2884
69.0909	-3.19856	23.406
69.0909	-2.12004	23.4915
69.0909	-1.04152	23.5668
69.0909	0.037	23.5969
70.1717	-29.083	19.551
70.1717	-28.0045	19.937
70.1717	-26.926	20.1273
70.1717	-25.8474	20.5365
70.1717	-24.7689	20.8881
70.1717	-23.6904	21.18
70.1717	-22.6119	21.1928
70.1717	-21.5334	21.2144
70.1717	-20.4549	21.2267
70.1717	-19.3763	21.2369
70.1717	-18.2978	21.2629
70.1717	-17.2193	21.2992
70.1717	-16.1408	21.3145
70.1717	-15.0623	21.3352
70.1717	-13.9837	21.4141
70.1717	-12.9052	21.5911
70.1717	-11.8267	21.6772
70.1717	-10.7482	21.6913
70.1717	-9.66967	21.7618
70.1717	-8.59115	21.8147
70.1717	-7.51263	21.8325
70.1717	-6.43411	21.8527
70.1717	-5.35559	21.9403
70.1717	-4.27707	22.0859
70.1717	-3.19856	22.1828
70.1717	-2.12004	22.2133
70.1717	-1.04152	22.2089
70.1717	0.037	22.242
71.2525	-29.083	19.637
71.2525	-28.0045	20.5501
71.2525	-26.926	20.3817
71.2525	-25.8474	20.4442
71.2525	-24.7689	20.6709
71.2525	-23.6904	20.8205
71.2525	-22.6119	20.7126
71.2525	-21.5334	20.7561
71.2525	-20.4549	20.7632
71.2525	-19.3763	20.7393
71.2525	-18.2978	20.789
71.2525	-17.2193	20.7728
71.2525	-16.1408	20.7837
71.2525	-15.0623	20.801
71.2525	-13.9837	20.7966
71.2525	-12.9052	20.7937
71.2525	-11.8267	20.7993
71.2525	-10.7482	20.7828
71.2525	-9.66967	20.7907
71.2525	-8.59115	20.8157
71.2525	-7.51263	20.8116
71.2525	-6.43411	20.8357
71.2525	-5.35559	20.8789
71.2525	-4.27707	20.9433
71.2525	-3.19856	21.0529
71.2525	-2.12004	21.1713
71.2525	-1.04152	21.2889
71.2525	0.037	21.3753
72.3333	-29.083	20.3586
72.3333	-28.0045	20.4191
72.3333	-26.926	20.1081
72.3333	-25.8474	20.0876
72.3333	-24.7689	20.0048
72.3333	-23.6904	19.6474
72.3333	-22.6119	19.2673
72.3333	-21.5334	19.1482
72.3333	-20.4549	19.1117
72.3333	-19.3763	19.1447
72.3333	-18.2978	19.1248
72.3333	-17.2193	19.1388
72.3333	-16.1408	19.1435
72.3333	-15.0623	19.1406
72.3333	-13.9837	19.1427
72.3333	-12.9052	19.1464
72.3333	-11.8267	19.1453
72.3333	-10.7482	19.171
72.3333	-9.66967	19.1795
72.3333	-8.59115	19.1805
72.3333	-7.51263	19.2045
72.3333	-6.43411	19.2041
72.3333	-5.35559	19.2259
72.3333	-4.27707	19.2768
72.3333	-3.19856	19.3327
72.3333	-2.12004	19.4975
72.3333	-1.04152	19.8367
72.3333	0.037	20.1693
73.4141	-29.083	20.599
73.4141	-28.0045	20.4727
73.4141	-26.926	19.8456
73.4141	-25.8474	19.7781
73.4141	-24.7689	19.5425
73.4141	-23.6904	19.2081
73.4141	-22.6119	18.7887
73.4141	-21.5334	18.5109
73.4141	-20.4549	18.4758
73.4141	-19.3763	18.4851
73.4141	-18.2978	18.4895
73.4141	-17.2193	18.4957
73.4141	-16.1408	18.5051
73.4141	-15.0623	18.511
73.4141	-13.9837	18.5155
73.4141	-12.9052	18.516
73.4141	-11.8267	18.5309
73.4141	-10.7482	18.5664
73.4141	-9.66967	18.5933
73.4141	-8.59115	18.6112
73.4141	-7.51263	18.6449
73.4141	-6.43411	18.6731
73.4141	-5.35559	18.7264
73.4141	-4.27707	18.8744
73.4141	-3.19856	19.0177
73.4141	-2.12004	19.1841
73.4141	-1.04152	19.5785
73.4141	0.037	20.2482
74.4949	-29.083	20.3126
74.4949	-28.0045	20.2963
74.4949	-26.926	19.8458
74.4949	-25.8474	19.659
74.4949	-24.7689	19.4202
74.4949	-23.6904	19.1139
74.4949	-22.6119	18.6579
74.4949	-21.5334	18.2966
74.4949	-20.4549	18.2738
74.4949	-19.3763	18.2753
74.4949	-18.2978	18.2782
74.4949	-17.2193	18.2861
74.4949	-16.1408	18.3001
74.4949	-15.0623	18.307
74.4949	-13.9837	18.3207
74.4949	-12.9052	18.3296
74.4949	-11.8267	18.335
74.4949	-10.7482	18.3512
74.4949	-9.66967	18.3653
74.4949	-8.59115	18.3878
74.4949	-7.51263	18.4752
74.4949	-6.43411	18.5431
74.4949	-5.35559	18.6052
74.4949	-4.27707	18.7217
74.4949	-3.19856	18.8737
74.4949	-2.12004	19.1951
74.4949	-1.04152	19.4696
74.4949	0.037	20.2453
75.5758	-29.083	20.0972
75.5758	-28.0045	20.2602
75.5758	-26.926	19.8199
75.5758	-25.8474	19.6735
75.5758	-24.7689	19.4969
75.5758	-23.6904	19.2551
75.5758	-22.6119	18.8953
75.5758	-21.5334	18.5702
75.5758	-20.4549	18.5231
75.5758	-19.3763	18.522
75.5758	-18.2978	18.5463
75.5758	-17.2193	18.5733
75.5758	-16.1408	18.6203
75.5758	-15.0623	18.6308
75.5758	-13.9837	18.6497
75.5758	-12.9052	18.6788
75.5758	-11.8267	18.6968
75.5758	-10.7482	18.7873
75.5758	-9.66967	19.0682
75.5758	-8.59115	19.3454
75.5758	-7.51263	19.4711
75.5758	-6.43411	19.5583
75.5758	-5.35559	19.6066
75.5758	-4.27707	19.6591
75.5758	-3.19856	19.8342
75.5758	-2.12004	20.4329
75.5758	-1.04152	20.8579
75.5758	0.037	21.0179
76.6566	-29.083	20.056
76.6566	-28.0045	20.1003
76.6566	-26.926	19.9291
76.6566	-25.8474	19.7715
76.6566	-24.7689	19.7346
76.6566	-23.6904	19.6491
76.6566	-22.6119	19.4141
76.6566	-21.5334	19.2763
76.6566	-20.4549	19.3262
76.6566	-19.3763	19.3852
76.6566	-18.2978	19.4236
76.6566	-17.2193	19.453
76.6566	-16.1408	19.4732
76.6566	-15.0623	19.5166
76.6566	-13.9837	19.5961
76.6566	-12.9052	19.6405
76.6566	-11.8267	19.6708
76.6566	-10.7482	19.7998
76.6566	-9.66967	20.0138
76.6566	-8.59115	20.2707
76.6566	-7.51263	20.7889
76.6566	-6.43411	21.2614
76.6566	-5.35559	21.5847
76.6566	-4.27707	21.7076
76.6566	-3.19856	21.8159
76.6566	-2.12004	22.2132
76.6566	-1.04152	22.6269
76.6566	0.037	22.6699
77.7374	-29.083	20.1678
77.7374	-28.0045	20.2998
77.7374	-26.926	20.1596
77.7374	-25.8474	20.1561
77.7374	-24.7689	19.9273
77.7374	-23.6904	20.0757
77.7374	-22.6119	19.9749
77.7374	-21.5334	19.9599
77.7374	-20.4549	20.0546
77.7374	-19.3763	20.1321
77.7374	-18.2978	20.1242
[truncated: 801 more rows]

## Sheet: Figure 3
Month	Z negative	Oxigen (mg L-1)				Month	ZPL
1	-28.5565	0				1	-7
1	-27.4582	0				2	-8
1	-26.3598	0				3	-8
1	-25.2615	0.392973				4	-7
1	-24.1632	2.71953				5	-6
1	-23.0649	2.87402				6	-6
1	-21.9665	2.99742				7	-7
1	-20.8682	3.2906				8	-8
1	-19.7699	3.49611				9	-6.3
1	-18.6716	4.30825				10	-7
1	-17.5732	4.68523				11	-6.26
1	-16.4749	4.62299				12	-9
1	-15.3766	4.90392				13	-7
1	-14.2782	5.2442				14	-5.4
1	-13.1799	5.67343				15	-4.9
1	-12.0816	6.19653				16	-5.8
1	-10.9833	6.73634				17	-6.2
1	-9.88494	7.07838				18	-5.5
1	-8.78662	7.60513				19	-5
1	-7.68829	7.77451				20	-6
1	-6.58996	7.81321				21	-5.4
1	-5.49163	7.96735				22	-4
1	-4.39331	8.43685				23	-4
1	-3.29498	9.18444				24	-13
1	-2.19665	9.05102				25	-12
1	-1.09833	9.02888				26	-7.5
1	0	9.01262				27	-5
2.08081	-28.5565	0				28	-5.6
2.08081	-27.4582	0				29	-4.8
2.08081	-26.3598	0.0535649				30	-5
2.08081	-25.2615	3.34951				31	-4.6
2.08081	-24.1632	4.43057				32	-3.7
2.08081	-23.0649	5.07959				33	-4.9
2.08081	-21.9665	5.07171				34	-3.1
2.08081	-20.8682	5.17595				35	-3.1
2.08081	-19.7699	5.11421				36	-4.8
2.08081	-18.6716	5.49451				37	-5.3
2.08081	-17.5732	5.53509				38	-4.6
2.08081	-16.4749	6.02158				39	-6.1
2.08081	-15.3766	6.40461				40	-4.8
2.08081	-14.2782	6.64998				41	-4.7
2.08081	-13.1799	6.98914				42	-5.8
2.08081	-12.0816	7.19321				43	-5.75
2.08081	-10.9833	7.2651				44	-5.7
2.08081	-9.88494	7.29043				45	-10
2.08081	-8.78662	7.36314				46	-5
2.08081	-7.68829	7.32453				47	-6.3
2.08081	-6.58996	7.47178				48	-20.7
2.08081	-5.49163	8.06611				49	-8
2.08081	-4.39331	8.6813				50	-7.2
2.08081	-3.29498	8.81729				51	-7.3
2.08081	-2.19665	8.73928				52	-6
2.08081	-1.09833	8.69524				53	-5.4
2.08081	0	8.70425				54	-6
3.16162	-28.5565	0				55	-6.2
3.16162	-27.4582	0				56	-4.7
3.16162	-26.3598	0.0160643				57	-4
3.16162	-25.2615	0.709015				58	-3.9
3.16162	-24.1632	0.862367				59	-5.7
3.16162	-23.0649	0.826279				60	-5.8
3.16162	-21.9665	0.86626				61	-8
3.16162	-20.8682	0.944582				62	-8
3.16162	-19.7699	1.02673				63	-6.43
3.16162	-18.6716	1.17146				64	-8
3.16162	-17.5732	1.35552				65	-3
3.16162	-16.4749	1.62367				66	-5.5
3.16162	-15.3766	1.81345				67	-5.5
3.16162	-14.2782	1.8578				68	-5.5
3.16162	-13.1799	2.06294				69	-5
3.16162	-12.0816	2.33642				70	-4.5
3.16162	-10.9833	2.99786				71	-7
3.16162	-9.88494	4.07056				72	-5.7
3.16162	-8.78662	4.62396				73	-6.3
3.16162	-7.68829	4.74832				74	-5.6
3.16162	-6.58996	4.78255				75	-5.6
3.16162	-5.49163	5.37834				76	-4
3.16162	-4.39331	6.55956				77	-5.8
3.16162	-3.29498	7.80584				78	-6.2
3.16162	-2.19665	8.41261				79	-6.75
3.16162	-1.09833	8.68123				80	-7.3
3.16162	0	8.73893				81	-7.5
4.24242	-28.5565	0				82	-7.3
4.24242	-27.4582	0				83	-8
4.24242	-26.3598	0				84	-6.7
4.24242	-25.2615	0				85	-10
4.24242	-24.1632	0				86	-5.4
4.24242	-23.0649	0				87	-6
4.24242	-21.9665	0.037				88	-6.4
4.24242	-20.8682	0.0402844				89	-4.7
4.24242	-19.7699	0.0346837				90	-5
4.24242	-18.6716	0.0426588				91	-5.2
4.24242	-17.5732	0.0530199				92	-8
4.24242	-16.4749	0.0433943				93	-10.8
4.24242	-15.3766	0.0442999				94	-3.8
4.24242	-14.2782	0.0176685				95	-6.15
4.24242	-13.1799	0.0121339				96	-8.5
4.24242	-12.0816	0.2				97	-8.2
4.24242	-10.9833	0.0161738				98	-8.4
4.24242	-9.88494	0.189257				99	-7.7
4.24242	-8.78662	0.607032				100	-7
4.24242	-7.68829	1.1093				101	-6
4.24242	-6.58996	2.25405				102	-10
4.24242	-5.49163	4.30276				103	-8
4.24242	-4.39331	5.73229				104	-4.5
4.24242	-3.29498	7.62316				105	-5.4
4.24242	-2.19665	9.58797				106	-8
4.24242	-1.09833	11.1407				107	-4
4.24242	0	11.564				108	-3
5.32323	-28.5565	0
5.32323	-27.4582	0
5.32323	-26.3598	0
5.32323	-25.2615	0
5.32323	-24.1632	0
5.32323	-23.0649	0
5.32323	-21.9665	0.335793
5.32323	-20.8682	0.345597
5.32323	-19.7699	0.328158
5.32323	-18.6716	0.352012
5.32323	-17.5732	0.357475
5.32323	-16.4749	0.358418
5.32323	-15.3766	0.370248
5.32323	-14.2782	0.372903
5.32323	-13.1799	0.397607
5.32323	-12.0816	0.403319
5.32323	-10.9833	0.409395
5.32323	-9.88494	0.424811
5.32323	-8.78662	0.712255
5.32323	-7.68829	2.0016
5.32323	-6.58996	4.51168
5.32323	-5.49163	7.10012
5.32323	-4.39331	8.01718
5.32323	-3.29498	8.08189
5.32323	-2.19665	8.19163
5.32323	-1.09833	8.38824
5.32323	0	8.52393
6.40404	-28.5565	0
6.40404	-27.4582	0
6.40404	-26.3598	0
6.40404	-25.2615	0
6.40404	-24.1632	0
6.40404	-23.0649	0
6.40404	-21.9665	0.202004
6.40404	-20.8682	0.247069
6.40404	-19.7699	0.255729
6.40404	-18.6716	0.260315
6.40404	-17.5732	0.276814
6.40404	-16.4749	0.283466
6.40404	-15.3766	0.293273
6.40404	-14.2782	0.303908
6.40404	-13.1799	0.310224
6.40404	-12.0816	0.322636
6.40404	-10.9833	0.322261
6.40404	-9.88494	0.321969
6.40404	-8.78662	0.476904
6.40404	-7.68829	2.09661
6.40404	-6.58996	3.96672
6.40404	-5.49163	4.4383
6.40404	-4.39331	5.55919
6.40404	-3.29498	6.09166
6.40404	-2.19665	6.20581
6.40404	-1.09833	6.3643
6.40404	0	6.62813
7.48485	-28.5565	0
7.48485	-27.4582	0
7.48485	-26.3598	0
7.48485	-25.2615	0
7.48485	-24.1632	0
7.48485	-23.0649	0
7.48485	-21.9665	0.280969
7.48485	-20.8682	0.347309
7.48485	-19.7699	0.320919
7.48485	-18.6716	0.368112
7.48485	-17.5732	0.359276
7.48485	-16.4749	0.344422
7.48485	-15.3766	0.359394
7.48485	-14.2782	0.352839
7.48485	-13.1799	0.333215
7.48485	-12.0816	0.370036
7.48485	-10.9833	0.420051
7.48485	-9.88494	0.688194
7.48485	-8.78662	1.61147
7.48485	-7.68829	4.36335
7.48485	-6.58996	6.54252
7.48485	-5.49163	6.65566
7.48485	-4.39331	6.80756
7.48485	-3.29498	7.01877
7.48485	-2.19665	7.25277
7.48485	-1.09833	7.41863
7.48485	0	7.47057
8.56566	-28.5565	0
8.56566	-27.4582	0
8.56566	-26.3598	0
8.56566	-25.2615	0
8.56566	-24.1632	0
8.56566	-23.0649	0
8.56566	-21.9665	0.129315
8.56566	-20.8682	0.150451
8.56566	-19.7699	0.124035
8.56566	-18.6716	0.162257
8.56566	-17.5732	0.142347
8.56566	-16.4749	0.129993
8.56566	-15.3766	0.335097
8.56566	-14.2782	0.51966
8.56566	-13.1799	0.494151
8.56566	-12.0816	0.419712
8.56566	-10.9833	0.323182
8.56566	-9.88494	0.456581
8.56566	-8.78662	1.41541
8.56566	-7.68829	4.5514
8.56566	-6.58996	6.34513
8.56566	-5.49163	6.54571
8.56566	-4.39331	6.77693
8.56566	-3.29498	6.92225
8.56566	-2.19665	7.09105
8.56566	-1.09833	7.11314
8.56566	0	7.16226
9.64646	-28.5565	0
9.64646	-27.4582	0
9.64646	-26.3598	0.26109
9.64646	-25.2615	0.0309813
9.64646	-24.1632	0
9.64646	-23.0649	0
9.64646	-21.9665	0
9.64646	-20.8682	0
9.64646	-19.7699	0.00967348
9.64646	-18.6716	0.0287824
9.64646	-17.5732	0.0368113
9.64646	-16.4749	0.0237198
9.64646	-15.3766	0.240732
9.64646	-14.2782	0.71848
9.64646	-13.1799	1.66391
9.64646	-12.0816	2.29211
9.64646	-10.9833	2.39584
9.64646	-9.88494	2.37983
9.64646	-8.78662	2.56926
9.64646	-7.68829	3.75874
9.64646	-6.58996	4.59048
9.64646	-5.49163	4.69235
9.64646	-4.39331	4.9063
9.64646	-3.29498	4.99182
9.64646	-2.19665	5.24084
9.64646	-1.09833	5.24933
9.64646	0	5.54613
10.7273	-28.5565	0
10.7273	-27.4582	0
10.7273	-26.3598	1.03322
10.7273	-25.2615	1.68612
10.7273	-24.1632	2.88643
10.7273	-23.0649	3.30349
10.7273	-21.9665	3.4099
10.7273	-20.8682	3.53795
10.7273	-19.7699	3.70707
10.7273	-18.6716	3.9856
10.7273	-17.5732	4.19993
10.7273	-16.4749	4.28736
10.7273	-15.3766	4.38885
10.7273	-14.2782	4.64685
10.7273	-13.1799	5.10351
10.7273	-12.0816	5.4256
10.7273	-10.9833	5.48962
10.7273	-9.88494	5.56265
10.7273	-8.78662	5.62298
10.7273	-7.68829	5.60698
10.7273	-6.58996	5.55811
10.7273	-5.49163	5.65196
10.7273	-4.39331	5.89762
10.7273	-3.29498	6.51918
10.7273	-2.19665	7.4672
10.7273	-1.09833	7.66838
10.7273	0	7.62313
11.8081	-28.5565	0
11.8081	-27.4582	0
11.8081	-26.3598	1.32392
11.8081	-25.2615	2.77225
11.8081	-24.1632	5.38227
11.8081	-23.0649	5.66081
11.8081	-21.9665	5.65203
11.8081	-20.8682	5.77278
11.8081	-19.7699	5.80104
11.8081	-18.6716	5.86693
11.8081	-17.5732	5.89839
11.8081	-16.4749	5.91217
11.8081	-15.3766	5.97457
11.8081	-14.2782	6.08904
11.8081	-13.1799	6.13835
11.8081	-12.0816	6.1359
11.8081	-10.9833	6.16401
11.8081	-9.88494	6.17268
11.8081	-8.78662	6.18093
11.8081	-7.68829	6.18637
11.8081	-6.58996	6.22375
11.8081	-5.49163	6.43576
11.8081	-4.39331	6.65367
11.8081	-3.29498	6.83201
11.8081	-2.19665	6.98389
11.8081	-1.09833	6.99675
11.8081	0	7.1298
12.8889	-28.5565	0
12.8889	-27.4582	0
12.8889	-26.3598	1.08703
12.8889	-25.2615	1.62816
12.8889	-24.1632	0.855318
12.8889	-23.0649	4.63859
12.8889	-21.9665	4.76441
12.8889	-20.8682	4.83019
12.8889	-19.7699	4.81804
12.8889	-18.6716	4.88738
12.8889	-17.5732	4.88916
12.8889	-16.4749	4.91978
12.8889	-15.3766	4.90166
12.8889	-14.2782	4.90109
12.8889	-13.1799	4.86154
12.8889	-12.0816	4.86735
12.8889	-10.9833	4.88846
12.8889	-9.88494	4.93295
12.8889	-8.78662	5.08728
12.8889	-7.68829	5.23568
12.8889	-6.58996	5.35666
12.8889	-5.49163	5.45795
12.8889	-4.39331	5.64605
12.8889	-3.29498	6.02949
12.8889	-2.19665	6.19795
12.8889	-1.09833	6.22013
12.8889	0	6.38283
13.9697	-28.5565	0
13.9697	-27.4582	0
13.9697	-26.3598	0
13.9697	-25.2615	1.14001
13.9697	-24.1632	2.74833
13.9697	-23.0649	4.85402
13.9697	-21.9665	4.74355
13.9697	-20.8682	4.57226
13.9697	-19.7699	4.49424
13.9697	-18.6716	4.57668
13.9697	-17.5732	4.62016
13.9697	-16.4749	4.609
13.9697	-15.3766	4.60375
13.9697	-14.2782	4.75296
13.9697	-13.1799	5.42855
13.9697	-12.0816	5.59908
13.9697	-10.9833	5.51509
13.9697	-9.88494	5.6676
13.9697	-8.78662	5.97182
13.9697	-7.68829	6.4073
13.9697	-6.58996	6.59951
13.9697	-5.49163	6.61102
13.9697	-4.39331	7.34165
13.9697	-3.29498	8.18487
13.9697	-2.19665	8.44538
13.9697	-1.09833	8.61382
13.9697	0	8.69403
15.0505	-28.5565	0
15.0505	-27.4582	0
15.0505	-26.3598	0
15.0505	-25.2615	0
15.0505	-24.1632	1.16353
15.0505	-23.0649	0.399943
15.0505	-21.9665	1.16532
15.0505	-20.8682	1.60257
15.0505	-19.7699	1.7557
15.0505	-18.6716	1.96147
15.0505	-17.5732	2.10419
15.0505	-16.4749	2.10074
15.0505	-15.3766	2.20532
15.0505	-14.2782	2.17512
15.0505	-13.1799	2.39714
15.0505	-12.0816	3.40601
15.0505	-10.9833	4.11324
15.0505	-9.88494	4.81104
15.0505	-8.78662	5.55903
15.0505	-7.68829	5.78178
15.0505	-6.58996	6.2157
15.0505	-5.49163	6.58976
15.0505	-4.39331	7.15843
15.0505	-3.29498	7.60589
15.0505	-2.19665	7.71593
15.0505	-1.09833	7.70109
15.0505	0	7.85952
16.1313	-28.5565	0
16.1313	-27.4582	0
16.1313	-26.3598	0
16.1313	-25.2615	0
16.1313	-24.1632	0.0994887
16.1313	-23.0649	0
16.1313	-21.9665	0.0406117
16.1313	-20.8682	0.075833
16.1313	-19.7699	0.100411
16.1313	-18.6716	0.131255
16.1313	-17.5732	0.215489
16.1313	-16.4749	0.411364
16.1313	-15.3766	0.814112
16.1313	-14.2782	1.19827
16.1313	-13.1799	1.51664
16.1313	-12.0816	1.83017
16.1313	-10.9833	2.03127
16.1313	-9.88494	2.681
16.1313	-8.78662	3.35615
16.1313	-7.68829	4.40455
16.1313	-6.58996	6.77946
16.1313	-5.49163	8.78038
16.1313	-4.39331	9.57168
16.1313	-3.29498	10.0694
16.1313	-2.19665	10.7368
16.1313	-1.09833	10.9153
16.1313	0	10.221
17.2121	-28.5565	0
17.2121	-27.4582	0
17.2121	-26.3598	0
17.2121	-25.2615	0
17.2121	-24.1632	0
17.2121	-23.0649	0
17.2121	-21.9665	0
17.2121	-20.8682	0.136874
17.2121	-19.7699	0.205188
17.2121	-18.6716	0.203361
17.2121	-17.5732	0.212604
17.2121	-16.4749	0.233793
17.2121	-15.3766	0.244721
17.2121	-14.2782	0.248376
17.2121	-13.1799	0.270615
17.2121	-12.0816	0.300191
17.2121	-10.9833	0.375662
17.2121	-9.88494	0.679321
17.2121	-8.78662	2.13535
17.2121	-7.68829	3.97743
17.2121	-6.58996	5.05526
17.2121	-5.49163	6.56683
17.2121	-4.39331	8.41208
17.2121	-3.29498	9.19602
17.2121	-2.19665	9.50965
17.2121	-1.09833	9.87662
17.2121	0	10.9622
18.2929	-28.5565	0
18.2929	-27.4582	0
18.2929	-26.3598	0
18.2929	-25.2615	0
18.2929	-24.1632	0
18.2929	-23.0649	0
18.2929	-21.9665	0
18.2929	-20.8682	0
18.2929	-19.7699	0.229729
18.2929	-18.6716	0.250457
18.2929	-17.5732	0.259006
18.2929	-16.4749	0.269629
18.2929	-15.3766	0.281226
18.2929	-14.2782	0.293903
18.2929	-13.1799	0.313107
18.2929	-12.0816	0.324726
18.2929	-10.9833	0.320791
18.2929	-9.88494	0.327063
18.2929	-8.78662	0.768179
18.2929	-7.68829	2.5193
18.2929	-6.58996	4.63975
18.2929	-5.49163	6.09263
18.2929	-4.39331	7.1682
18.2929	-3.29498	7.74944
18.2929	-2.19665	8.23735
18.2929	-1.09833	8.44559
18.2929	0	8.71502
19.3737	-28.5565	0
19.3737	-27.4582	0
19.3737	-26.3598	0
19.3737	-25.2615	0
19.3737	-24.1632	0
19.3737	-23.0649	0
19.3737	-21.9665	0
19.3737	-20.8682	0
19.3737	-19.7699	0.0880952
19.3737	-18.6716	0.0818369
19.3737	-17.5732	0.086753
19.3737	-16.4749	0.102375
19.3737	-15.3766	0.119735
19.3737	-14.2782	0.133195
19.3737	-13.1799	0.143232
19.3737	-12.0816	0.140508
19.3737	-10.9833	0.170615
19.3737	-9.88494	0.340641
19.3737	-8.78662	1.06204
19.3737	-7.68829	3.76169
19.3737	-6.58996	7.54508
19.3737	-5.49163	8.42198
19.3737	-4.39331	8.69708
19.3737	-3.29498	8.88067
19.3737	-2.19665	8.96128
19.3737	-1.09833	8.93434
19.3737	0	8.71357
20.4545	-28.5565	0
20.4545	-27.4582	0
20.4545	-26.3598	0.448198
20.4545	-25.2615	0
20.4545	-24.1632	0.00309774
20.4545	-23.0649	0
20.4545	-21.9665	0
20.4545	-20.8682	0
20.4545	-19.7699	0.189873
20.4545	-18.6716	0.16841
20.4545	-17.5732	0.169408
20.4545	-16.4749	0.187396
20.4545	-15.3766	0.189347
20.4545	-14.2782	0.199405
20.4545	-13.1799	0.220621
20.4545	-12.0816	0.212444
20.4545	-10.9833	0.219245
20.4545	-9.88494	0.55739
20.4545	-8.78662	2.39893
20.4545	-7.68829	5.54518
20.4545	-6.58996	7.45131
20.4545	-5.49163	7.7456
20.4545	-4.39331	8.02575
20.4545	-3.29498	8.12715
20.4545	-2.19665	8.16493
20.4545	-1.09833	8.16136
20.4545	0	8.0832
21.5354	-28.5565	0
21.5354	-27.4582	0
21.5354	-26.3598	0
21.5354	-25.2615	0
21.5354	-24.1632	0.247078
21.5354	-23.0649	0.338674
21.5354	-21.9665	0
21.5354	-20.8682	0
21.5354	-19.7699	0
21.5354	-18.6716	0
21.5354	-17.5732	0
21.5354	-16.4749	0
21.5354	-15.3766	0
21.5354	-14.2782	0
21.5354	-13.1799	0
21.5354	-12.0816	0.1261
21.5354	-10.9833	0.888383
21.5354	-9.88494	1.77724
21.5354	-8.78662	3.31371
21.5354	-7.68829	5.35413
21.5354	-6.58996	6.10013
21.5354	-5.49163	6.377
21.5354	-4.39331	6.60315
21.5354	-3.29498	6.73523
21.5354	-2.19665	6.8269
21.5354	-1.09833	6.93898
21.5354	0	7.1599
22.6162	-28.5565	0
22.6162	-27.4582	0
22.6162	-26.3598	0
22.6162	-25.2615	0
22.6162	-24.1632	0.888368
22.6162	-23.0649	1.87141
22.6162	-21.9665	3.00763
22.6162	-20.8682	3.01293
22.6162	-19.7699	3.06684
22.6162	-18.6716	3.05698
22.6162	-17.5732	3.11527
22.6162	-16.4749	3.13171
22.6162	-15.3766	3.08026
22.6162	-14.2782	3.19591
22.6162	-13.1799	3.1318
22.6162	-12.0816	3.24745
22.6162	-10.9833	3.82051
22.6162	-9.88494	4.42157
22.6162	-8.78662	4.81599
22.6162	-7.68829	5.33035
22.6162	-6.58996	5.82144
22.6162	-5.49163	6.1245
22.6162	-4.39331	6.37288
22.6162	-3.29498	6.61932
22.6162	-2.19665	6.84537
22.6162	-1.09833	6.99084
22.6162	0	7.21396
23.697	-28.5565	0
23.697	-27.4582	0
23.697	-26.3598	0
23.697	-25.2615	0
23.697	-24.1632	0.839139
23.697	-23.0649	2.31855
23.697	-21.9665	4.48413
23.697	-20.8682	4.64722
23.697	-19.7699	4.6531
23.697	-18.6716	4.69461
23.697	-17.5732	4.74104
23.697	-16.4749	4.78005
23.697	-15.3766	4.74054
23.697	-14.2782	4.7748
23.697	-13.1799	4.72607
23.697	-12.0816	4.69188
23.697	-10.9833	4.70547
23.697	-9.88494	4.7371
23.697	-8.78662	4.75874
23.697	-7.68829	4.79316
23.697	-6.58996	4.83592
23.697	-5.49163	4.92846
23.697	-4.39331	5.1171
23.697	-3.29498	5.3469
23.697	-2.19665	5.55076
23.697	-1.09833	5.76473
23.697	0	6.34747
24.7778	-28.5565	0
24.7778	-27.4582	0
24.7778	-26.3598	0
24.7778	-25.2615	0
24.7778	-24.1632	0.249246
24.7778	-23.0649	1.02002
24.7778	-21.9665	5.30585
24.7778	-20.8682	6.2736
24.7778	-19.7699	6.13975
24.7778	-18.6716	6.15868
24.7778	-17.5732	6.10032
24.7778	-16.4749	6.14778
24.7778	-15.3766	6.15279
24.7778	-14.2782	6.1717
24.7778	-13.1799	6.32028
24.7778	-12.0816	6.34814
24.7778	-10.9833	6.36423
24.7778	-9.88494	6.35847
24.7778	-8.78662	6.38491
24.7778	-7.68829	6.39186
24.7778	-6.58996	6.41354
24.7778	-5.49163	6.51711
24.7778	-4.39331	6.66455
24.7778	-3.29498	6.9027
24.7778	-2.19665	7.11448
24.7778	-1.09833	7.28693
24.7778	0	7.4698
25.8586	-28.5565	0
25.8586	-27.4582	0
25.8586	-26.3598	0
25.8586	-25.2615	0
25.8586	-24.1632	0
25.8586	-23.0649	0.43757
25.8586	-21.9665	2.19538
25.8586	-20.8682	3.9337
25.8586	-19.7699	4.19211
25.8586	-18.6716	4.84058
25.8586	-17.5732	5.71116
25.8586	-16.4749	5.81695
25.8586	-15.3766	6.09319
25.8586	-14.2782	6.36683
25.8586	-13.1799	6.5425
25.8586	-12.0816	6.62915
25.8586	-10.9833	6.72924
25.8586	-9.88494	6.81474
25.8586	-8.78662	6.9684
25.8586	-7.68829	7.04998
25.8586	-6.58996	7.19021
25.8586	-5.49163	7.49136
25.8586	-4.39331	7.80436
25.8586	-3.29498	8.10596
25.8586	-2.19665	8.35128
25.8586	-1.09833	8.61662
25.8586	0	8.64121
26.9394	-28.5565	0
26.9394	-27.4582	0
26.9394	-26.3598	0
26.9394	-25.2615	0
26.9394	-24.1632	0
26.9394	-23.0649	0.156079
26.9394	-21.9665	0.708751
26.9394	-20.8682	3.06138
26.9394	-19.7699	5.18632
26.9394	-18.6716	5.36607
26.9394	-17.5732	5.6206
26.9394	-16.4749	5.56881
26.9394	-15.3766	5.3585
26.9394	-14.2782	5.29894
26.9394	-13.1799	6.12914
26.9394	-12.0816	6.59224
26.9394	-10.9833	6.85283
26.9394	-9.88494	7.0305
26.9394	-8.78662	7.18658
26.9394	-7.68829	7.21484
26.9394	-6.58996	7.274
26.9394	-5.49163	7.59398
26.9394	-4.39331	7.95617
26.9394	-3.29498	8.37574
26.9394	-2.19665	8.92301
26.9394	-1.09833	9.16674
26.9394	0	9.28094
28.0202	-28.5565	0
28.0202	-27.4582	0
28.0202	-26.3598	0
28.0202	-25.2615	0
28.0202	-24.1632	0
28.0202	-23.0649	0
28.0202	-21.9665	0
28.0202	-20.8682	0.383586
28.0202	-19.7699	0.742735
28.0202	-18.6716	0.836292
28.0202	-17.5732	1.13968
28.0202	-16.4749	1.13921
28.0202	-15.3766	1.22659
28.0202	-14.2782	1.24757
28.0202	-13.1799	1.42896
28.0202	-12.0816	1.64937
28.0202	-10.9833	2.32197
28.0202	-9.88494	3.48688
28.0202	-8.78662	3.91121
28.0202	-7.68829	4.76035
28.0202	-6.58996	5.24533
28.0202	-5.49163	5.63609
28.0202	-4.39331	6.00513
28.0202	-3.29498	6.37869
28.0202	-2.19665	6.79274
28.0202	-1.09833	7.25676
28.0202	0	7.78801
29.101	-28.5565	0
29.101	-27.4582	0
29.101	-26.3598	0
29.101	-25.2615	0
29.101	-24.1632	0
29.101	-23.0649	0
29.101	-21.9665	0
29.101	-20.8682	0
29.101	-19.7699	0
29.101	-18.6716	0
29.101	-17.5732	0.193094
29.101	-16.4749	0.192448
29.101	-15.3766	0.211018
29.101	-14.2782	0.229445
29.101	-13.1799	0.253119
29.101	-12.0816	0.268684
29.101	-10.9833	0.281057
29.101	-9.88494	0.363009
29.101	-8.78662	0.682168
29.101	-7.68829	1.31738
29.101	-6.58996	2.80813
29.101	-5.49163	4.32894
29.101	-4.39331	6.04098
29.101	-3.29498	7.67012
29.101	-2.19665	8.07959
29.101	-1.09833	8.1579
29.101	0	8.37686
30.1818	-28.5565	0
30.1818	-27.4582	0
30.1818	-26.3598	0
30.1818	-25.2615	0
30.1818	-24.1632	0
30.1818	-23.0649	0
30.1818	-21.9665	0
30.1818	-20.8682	0
30.1818	-19.7699	0
30.1818	-18.6716	0
30.1818	-17.5732	0.152669
30.1818	-16.4749	0.163947
30.1818	-15.3766	0.173631
30.1818	-14.2782	0.185267
30.1818	-13.1799	0.19304
30.1818	-12.0816	0.200144
30.1818	-10.9833	0.212355
30.1818	-9.88494	0.269517
30.1818	-8.78662	0.542436
30.1818	-7.68829	1.54333
30.1818	-6.58996	4.38285
30.1818	-5.49163	7.16755
30.1818	-4.39331	7.86627
30.1818	-3.29498	8.04069
30.1818	-2.19665	8.13656
30.1818	-1.09833	8.24806
30.1818	0	8.39089
31.2626	-28.5565	0
31.2626	-27.4582	0
31.2626	-26.3598	0
31.2626	-25.2615	0
31.2626	-24.1632	0
31.2626	-23.0649	0
31.2626	-21.9665	0
31.2626	-20.8682	0
31.2626	-19.7699	0
31.2626	-18.6716	0
31.2626	-17.5732	0.0583693
31.2626	-16.4749	0.129127
31.2626	-15.3766	0.143238
31.2626	-14.2782	0.148118
31.2626	-13.1799	0.149184
31.2626	-12.0816	0.142771
31.2626	-10.9833	0.143954
31.2626	-9.88494	0.305834
31.2626	-8.78662	1.23617
31.2626	-7.68829	2.59923
31.2626	-6.58996	4.12347
31.2626	-5.49163	7.23648
31.2626	-4.39331	8.59857
31.2626	-3.29498	8.74745
31.2626	-2.19665	8.88431
31.2626	-1.09833	9.06131
31.2626	0	9.07293
32.3434	-28.5565	0
32.3434	-27.4582	0
32.3434	-26.3598	0
32.3434	-25.2615	0
32.3434	-24.1632	0
32.3434	-23.0649	0
32.3434	-21.9665	0
32.3434	-20.8682	0
32.3434	-19.7699	0
32.3434	-18.6716	0
32.3434	-17.5732	0.0434597
32.3434	-16.4749	0.114567
32.3434	-15.3766	0.105973
32.3434	-14.2782	0.0988713
32.3434	-13.1799	0.0916092
32.3434	-12.0816	0.207166
32.3434	-10.9833	0.628782
32.3434	-9.88494	1.03667
32.3434	-8.78662	1.68995
32.3434	-7.68829	2.70935
32.3434	-6.58996	5.05216
32.3434	-5.49163	7.12764
32.3434	-4.39331	7.257
32.3434	-3.29498	7.34266
32.3434	-2.19665	7.42396
32.3434	-1.09833	7.5075
32.3434	0	7.63072
33.4242	-28.5565	0
33.4242	-27.4582	0
33.4242	-26.3598	0.0399469
33.4242	-25.2615	0.0368758
33.4242	-24.1632	0
33.4242	-23.0649	0
33.4242	-21.9665	0
33.4242	-20.8682	0
33.4242	-19.7699	0
33.4242	-18.6716	0
33.4242	-17.5732	0
33.4242	-16.4749	0.0593432
33.4242	-15.3766	0.128632
33.4242	-14.2782	0.199362
33.4242	-13.1799	0.495321
33.4242	-12.0816	1.85698
33.4242	-10.9833	3.09737
33.4242	-9.88494	3.70498
33.4242	-8.78662	4.28983
33.4242	-7.68829	4.84022
33.4242	-6.58996	5.09076
33.4242	-5.49163	5.57829
33.4242	-4.39331	5.87012
33.4242	-3.29498	6.0974
33.4242	-2.19665	6.27076
33.4242	-1.09833	6.36025
33.4242	0	6.50536
34.5051	-28.5565	0
34.5051	-27.4582	0
34.5051	-26.3598	0
34.5051	-25.2615	0
34.5051	-24.1632	0.501083
34.5051	-23.0649	0.326037
34.5051	-21.9665	0.640779
34.5051	-20.8682	2.33129
34.5051	-19.7699	2.45863
34.5051	-18.6716	2.46589
34.5051	-17.5732	2.52822
34.5051	-16.4749	2.68917
34.5051	-15.3766	2.78145
34.5051	-14.2782	2.84035
34.5051	-13.1799	3.20219
34.5051	-12.0816	4.51714
34.5051	-10.9833	4.98402
34.5051	-9.88494	5.03226
34.5051	-8.78662	5.24865
34.5051	-7.68829	5.38116
34.5051	-6.58996	5.45534
34.5051	-5.49163	5.6408
34.5051	-4.39331	5.81833
34.5051	-3.29498	6.01052
34.5051	-2.19665	6.15649
34.5051	-1.09833	6.31144
34.5051	0	6.65274
35.5859	-28.5565	0
35.5859	-27.4582	0
35.5859	-26.3598	1.42921
35.5859	-25.2615	1.58266
35.5859	-24.1632	1.73173
35.5859	-23.0649	1.33563
35.5859	-21.9665	4.02461
35.5859	-20.8682	5.86172
35.5859	-19.7699	5.94991
35.5859	-18.6716	5.90257
35.5859	-17.5732	5.88657
35.5859	-16.4749	5.98811
35.5859	-15.3766	6.06719
35.5859	-14.2782	6.05067
35.5859	-13.1799	5.99784
35.5859	-12.0816	5.91422
35.5859	-10.9833	5.8821
35.5859	-9.88494	5.97124
35.5859	-8.78662	6.2144
35.5859	-7.68829	6.31929
35.5859	-6.58996	6.40868
35.5859	-5.49163	6.50854
35.5859	-4.39331	6.68886
35.5859	-3.29498	7.17655
35.5859	-2.19665	7.3631
35.5859	-1.09833	7.38256
35.5859	0	7.48697
36.6667	-28.5565	0
36.6667	-27.4582	0
36.6667	-26.3598	1.64998
36.6667	-25.2615	2.55513
36.6667	-24.1632	3.73293
36.6667	-23.0649	4.37969
36.6667	-21.9665	5.97335
36.6667	-20.8682	6.32597
36.6667	-19.7699	6.29866
36.6667	-18.6716	6.31755
36.6667	-17.5732	6.26798
36.6667	-16.4749	6.28407
36.6667	-15.3766	6.24107
36.6667	-14.2782	6.35298
36.6667	-13.1799	6.33408
36.6667	-12.0816	6.33245
36.6667	-10.9833	6.39375
36.6667	-9.88494	6.44068
36.6667	-8.78662	6.70605
36.6667	-7.68829	6.78356
36.6667	-6.58996	6.87069
36.6667	-5.49163	7.08766
36.6667	-4.39331	7.38023
36.6667	-3.29498	7.74606
36.6667	-2.19665	7.95248
36.6667	-1.09833	7.98086
36.6667	0	8.05623
37.7475	-28.5565	0
37.7475	-27.4582	0
37.7475	-26.3598	1.73573
37.7475	-25.2615	2.86699
37.7475	-24.1632	5.15552
37.7475	-23.0649	6.48123
37.7475	-21.9665	6.60787
37.7475	-20.8682	6.71043
37.7475	-19.7699	7.16219
37.7475	-18.6716	7.39767
37.7475	-17.5732	7.63535
37.7475	-16.4749	8.18877
37.7475	-15.3766	8.16058
37.7475	-14.2782	8.1596
37.7475	-13.1799	8.04108
37.7475	-12.0816	8.3149
37.7475	-10.9833	8.54396
37.7475	-9.88494	8.50739
37.7475	-8.78662	8.65994
37.7475	-7.68829	8.64622
37.7475	-6.58996	9.04059
37.7475	-5.49163	9.79006
37.7475	-4.39331	10.1879
37.7475	-3.29498	10.4284
37.7475	-2.19665	10.5869
37.7475	-1.09833	10.6683
37.7475	0	10.7123
38.8283	-28.5565	0
38.8283	-27.4582	0
38.8283	-26.3598	1.46181
38.8283	-25.2615	1.68495
38.8283	-24.1632	1.46806
38.8283	-23.0649	1.76249
38.8283	-21.9665	2.03339
38.8283	-20.8682	2.25116
38.8283	-19.7699	2.49874
38.8283	-18.6716	2.67466
38.8283	-17.5732	2.9229
38.8283	-16.4749	3.19209
38.8283	-15.3766	4.00506
38.8283	-14.2782	4.49917
38.8283	-13.1799	4.83716
38.8283	-12.0816	5.28944
38.8283	-10.9833	5.99021
38.8283	-9.88494	7.23634
38.8283	-8.78662	7.62448
38.8283	-7.68829	8.18338
38.8283	-6.58996	8.90092
38.8283	-5.49163	9.78996
38.8283	-4.39331	10.2537
38.8283	-3.29498	10.3509
38.8283	-2.19665	10.2937
38.8283	-1.09833	10.287
38.8283	0	10.3114
39.9091	-28.5565	0
39.9091	-27.4582	0
39.9091	-26.3598	0
39.9091	-25.2615	0
39.9091	-24.1632	0.291292
39.9091	-23.0649	0.281923
39.9091	-21.9665	0.325729
39.9091	-20.8682	0.349606
39.9091	-19.7699	0.362618
39.9091	-18.6716	0.375305
39.9091	-17.5732	0.403694
39.9091	-16.4749	0.421459
39.9091	-15.3766	0.593702
39.9091	-14.2782	0.808864
39.9091	-13.1799	1.01508
39.9091	-12.0816	1.47773
39.9091	-10.9833	2.98857
39.9091	-9.88494	3.31181
39.9091	-8.78662	3.85921
39.9091	-7.68829	4.50507
39.9091	-6.58996	5.0958
39.9091	-5.49163	6.64393
39.9091	-4.39331	7.84711
39.9091	-3.29498	8.04198
39.9091	-2.19665	8.22819
39.9091	-1.09833	8.36393
39.9091	0	9.05386
40.9899	-28.5565	0
40.9899	-27.4582	0
40.9899	-26.3598	0
40.9899	-25.2615	0
40.9899	-24.1632	0
40.9899	-23.0649	0
40.9899	-21.9665	0
40.9899	-20.8682	0
40.9899	-19.7699	0.355
40.9899	-18.6716	0.36
40.9899	-17.5732	0.38
40.9899	-16.4749	0.39
40.9899	-15.3766	0.4
40.9899	-14.2782	0.49
40.9899	-13.1799	0.6
40.9899	-12.0816	0.955212
40.9899	-10.9833	1.5638
40.9899	-9.88494	2.54098
40.9899	-8.78662	4.08137
40.9899	-7.68829	6.19017
40.9899	-6.58996	8.47418
40.9899	-5.49163	9.25928
40.9899	-4.39331	9.67102
40.9899	-3.29498	9.88709
40.9899	-2.19665	10.3364
40.9899	-1.09833	10.7297
40.9899	0	10.9397
42.0707	-28.5565	0
42.0707	-27.4582	0
42.0707	-26.3598	0
42.0707	-25.2615	0
42.0707	-24.1632	0
42.0707	-23.0649	0
42.0707	-21.9665	0
42.0707	-20.8682	0
42.0707	-19.7699	0.352553
42.0707	-18.6716	0.354724
42.0707	-17.5732	0.364228
42.0707	-16.4749	0.365182
42.0707	-15.3766	0.351217
42.0707	-14.2782	0.357181
42.0707	-13.1799	0.333122
42.0707	-12.0816	0.30465
42.0707	-10.9833	0.279705
42.0707	-9.88494	0.296834
42.0707	-8.78662	0.629487
42.0707	-7.68829	1.92688
42.0707	-6.58996	5.49541
42.0707	-5.49163	8.12244
42.0707	-4.39331	8.25619
42.0707	-3.29498	8.40491
42.0707	-2.19665	8.95333
42.0707	-1.09833	8.97443
42.0707	0	9.18715
43.1515	-28.5565	0
43.1515	-27.4582	0
43.1515	-26.3598	0
43.1515	-25.2615	0
43.1515	-24.1632	0
43.1515	-23.0649	0
43.1515	-21.9665	0.47752
43.1515	-20.8682	0
43.1515	-19.7699	0
43.1515	-18.6716	0.377207
43.1515	-17.5732	0.374644
43.1515	-16.4749	0.335095
43.1515	-15.3766	0.333201
43.1515	-14.2782	0.289857
43.1515	-13.1799	0.308485
43.1515	-12.0816	0.35615
43.1515	-10.9833	0.313408
43.1515	-9.88494	0.31803
43.1515	-8.78662	1.42475
43.1515	-7.68829	4.49478
43.1515	-6.58996	6.94237
43.1515	-5.49163	7.60478
43.1515	-4.39331	7.53532
43.1515	-3.29498	7.66996
43.1515	-2.19665	7.89772
43.1515	-1.09833	7.94846
43.1515	0	8.28552
44.2323	-28.5565	0
44.2323	-27.4582	0
44.2323	-26.3598	0
44.2323	-25.2615	0
44.2323	-24.1632	0.324916
44.2323	-23.0649	0.283065
44.2323	-21.9665	0.262537
44.2323	-20.8682	0.246938
44.2323	-19.7699	0.21972
44.2323	-18.6716	0.235891
44.2323	-17.5732	0.235666
44.2323	-16.4749	0.28419
44.2323	-15.3766	0.396879
44.2323	-14.2782	0.730774
44.2323	-13.1799	1.59827
44.2323	-12.0816	2.64463
44.2323	-10.9833	3.07157
44.2323	-9.88494	3.37227
44.2323	-8.78662	5.05356
44.2323	-7.68829	7.03745
44.2323	-6.58996	7.87114
44.2323	-5.49163	8.29713
44.2323	-4.39331	8.34572
44.2323	-3.29498	8.47378
44.2323	-2.19665	8.71214
44.2323	-1.09833	8.35746
44.2323	0	8.72518
45.3131	-28.5565	0
45.3131	-27.4582	0
45.3131	-26.3598	0.392255
45.3131	-25.2615	0.362022
45.3131	-24.1632	0.368324
45.3131	-23.0649	0.338329
45.3131	-21.9665	0.340973
45.3131	-20.8682	0.328656
45.3131	-19.7699	0.326171
45.3131	-18.6716	0.373566
45.3131	-17.5732	0.437136
45.3131	-16.4749	0.661316
45.3131	-15.3766	1.54896
45.3131	-14.2782	2.72186
45.3131	-13.1799	4.05952
45.3131	-12.0816	5.33069
45.3131	-10.9833	6.1492
45.3131	-9.88494	6.84564
45.3131	-8.78662	7.76133
45.3131	-7.68829	8.29161
45.3131	-6.58996	8.41575
45.3131	-5.49163	8.41735
45.3131	-4.39331	8.67016
45.3131	-3.29498	8.71149
45.3131	-2.19665	9.53458
45.3131	-1.09833	9.32742
45.3131	0	9.55847
46.3939	-28.5565	0
46.3939	-27.4582	0.831283
46.3939	-26.3598	1.20262
46.3939	-25.2615	1.53339
46.3939	-24.1632	1.55244
46.3939	-23.0649	1.52098
46.3939	-21.9665	1.52957
46.3939	-20.8682	1.48512
46.3939	-19.7699	1.48744
46.3939	-18.6716	1.47747
46.3939	-17.5732	1.49741
46.3939	-16.4749	1.67027
46.3939	-15.3766	2.73282
46.3939	-14.2782	3.56318
46.3939	-13.1799	4
46.3939	-12.0816	4.005
46.3939	-10.9833	4.52463
46.3939	-9.88494	5.54231
46.3939	-8.78662	7.30201
46.3939	-7.68829	8.39842
46.3939	-6.58996	8.99613
46.3939	-5.49163	9.08691
46.3939	-4.39331	9.55507
46.3939	-3.29498	9.81608
46.3939	-2.19665	9.99965
46.3939	-1.09833	9.94623
46.3939	0	9.91154
47.4747	-28.5565	0
47.4747	-27.4582	2.08728
47.4747	-26.3598	3.39522
47.4747	-25.2615	3.6439
47.4747	-24.1632	3.64578
47.4747	-23.0649	3.6849
47.4747	-21.9665	3.58955
47.4747	-20.8682	3.81041
47.4747	-19.7699	3.59657
47.4747	-18.6716	3.65535
47.4747	-17.5732	3.59326
47.4747	-16.4749	3.60672
47.4747	-15.3766	3.57436
47.4747	-14.2782	3.63488
47.4747	-13.1799	4.12599
47.4747	-12.0816	4.2
47.4747	-10.9833	4.37258
47.4747	-9.88494	5.02781
47.4747	-8.78662	5.43939
47.4747	-7.68829	5.59845
47.4747	-6.58996	6.15195
47.4747	-5.49163	6.45966
47.4747	-4.39331	6.40664
47.4747	-3.29498	6.62775
47.4747	-2.19665	6.65671
47.4747	-1.09833	6.55989
47.4747	0	7.54114
48.5556	-28.5565	0
48.5556	-27.4582	3.36746
48.5556	-26.3598	6.18468
48.5556	-25.2615	7.21847
48.5556	-24.1632	7.33801
48.5556	-23.0649	7.44723
48.5556	-21.9665	7.29804
48.5556	-20.8682	7.53476
48.5556	-19.7699	7.17604
48.5556	-18.6716	7.22539
48.5556	-17.5732	7.10921
48.5556	-16.4749	7.05684
48.5556	-15.3766	7.11433
48.5556	-14.2782	7.15684
48.5556	-13.1799	7.45184
48.5556	-12.0816	7.25073
48.5556	-10.9833	7.23885
48.5556	-9.88494	7.42861
48.5556	-8.78662	7.40991
48.5556	-7.68829	7.21856
48.5556	-6.58996	7.44644
48.5556	-5.49163	7.63117
48.5556	-4.39331	7.58346
48.5556	-3.29498	7.72229
48.5556	-2.19665	7.53245
48.5556	-1.09833	7.34288
48.5556	0	7.78776
49.6364	-28.5565	0
49.6364	-27.4582	2.19439
49.6364	-26.3598	3.43631
49.6364	-25.2615	5.9339
49.6364	-24.1632	6.09845
49.6364	-23.0649	6.25731
49.6364	-21.9665	6.35936
49.6364	-20.8682	6.53847
49.6364	-19.7699	6.53865
49.6364	-18.6716	6.50296
49.6364	-17.5732	6.57845
49.6364	-16.4749	6.631
49.6364	-15.3766	6.69559
49.6364	-14.2782	6.88739
49.6364	-13.1799	7.58475
49.6364	-12.0816	7.93321
49.6364	-10.9833	8.02535
49.6364	-9.88494	8.22604
49.6364	-8.78662	8.31157
49.6364	-7.68829	8.55261
49.6364	-6.58996	8.87657
49.6364	-5.49163	9.07264
49.6364	-4.39331	9.38274
49.6364	-3.29498	9.78079
49.6364	-2.19665	9.72321
49.6364	-1.09833	9.42359
49.6364	0	9.11585
50.7172	-28.5565	0
50.7172	-27.4582	0
50.7172	-26.3598	0.507508
50.7172	-25.2615	1.09
50.7172	-24.1632	1.08596
50.7172	-23.0649	1.12454
50.7172	-21.9665	1.13527
50.7172	-20.8682	1.22281
50.7172	-19.7699	1.40757
50.7172	-18.6716	1.24598
50.7172	-17.5732	1.66013
50.7172	-16.4749	1.80861
50.7172	-15.3766	1.99015
50.7172	-14.2782	2.49254
50.7172	-13.1799	2.90716
50.7172	-12.0816	3.21869
50.7172	-10.9833	3.74998
50.7172	-9.88494	5.24957
50.7172	-8.78662	6.538
50.7172	-7.68829	8.00305
50.7172	-6.58996	8.78125
50.7172	-5.49163	8.75047
50.7172	-4.39331	8.85613
50.7172	-3.29498	9.31057
50.7172	-2.19665	9.56228
50.7172	-1.09833	9.53546
50.7172	0	9.47082
51.798	-28.5565	0
51.798	-27.4582	0
51.798	-26.3598	0
51.798	-25.2615	0.5
51.798	-24.1632	1.41112
51.798	-23.0649	1.43641
51.798	-21.9665	1.44496
51.798	-20.8682	1.4043
51.798	-19.7699	1.29516
51.798	-18.6716	1.40211
51.798	-17.5732	1.36006
51.798	-16.4749	1.43627
51.798	-15.3766	1.59743
51.798	-14.2782	1.76511
51.798	-13.1799	1.93158
51.798	-12.0816	2.22183
51.798	-10.9833	3.29481
51.798	-9.88494	3.8287
51.798	-8.78662	4.579
51.798	-7.68829	5.63585
51.798	-6.58996	6.70442
51.798	-5.49163	7.37248
51.798	-4.39331	7.4575
51.798	-3.29498	7.60955
51.798	-2.19665	7.84107
51.798	-1.09833	8.06664
51.798	0	8.42836
52.8788	-28.5565	0
52.8788	-27.4582	0
52.8788	-26.3598	0
52.8788	-25.2615	0
52.8788	-24.1632	0.572466
52.8788	-23.0649	0.539966
52.8788	-21.9665	0.533996
52.8788	-20.8682	0.567541
52.8788	-19.7699	0.618481
52.8788	-18.6716	0.586045
52.8788	-17.5732	0.622499
52.8788	-16.4749	0.610128
52.8788	-15.3766	0.577149
52.8788	-14.2782	0.566075
52.8788	-13.1799	0.554326
52.8788	-12.0816	0.591186
52.8788	-10.9833	0.735426
52.8788	-9.88494	0.862577
52.8788	-8.78662	1.5233
52.8788	-7.68829	2.82594
52.8788	-6.58996	4.76894
52.8788	-5.49163	7.28537
52.8788	-4.39331	7.70907
52.8788	-3.29498	8.11323
52.8788	-2.19665	8.27101
52.8788	-1.09833	8.57518
52.8788	0	8.3531
53.9596	-28.5565	0
53.9596	-27.4582	0
53.9596	-26.3598	0.390028
53.9596	-25.2615	0
53.9596	-24.1632	0
53.9596	-23.0649	0.21325
53.9596	-21.9665	0.215752
53.9596	-20.8682	0.213818
53.9596	-19.7699	0.228882
53.9596	-18.6716	0.215431
53.9596	-17.5732	0.216905
53.9596	-16.4749	0.207823
53.9596	-15.3766	0.203902
53.9596	-14.2782	0.202523
53.9596	-13.1799	0.200226
53.9596	-12.0816	0.208348
53.9596	-10.9833	0.237787
53.9596	-9.88494	0.636396
53.9596	-8.78662	3.01263
53.9596	-7.68829	4.23578
53.9596	-6.58996	5.59042
53.9596	-5.49163	6.28452
53.9596	-4.39331	6.56759
53.9596	-3.29498	6.98631
53.9596	-2.19665	7.2767
53.9596	-1.09833	7.55128
53.9596	0	7.52476
55.0404	-28.5565	0
55.0404	-27.4582	0
55.0404	-26.3598	0
55.0404	-25.2615	0
55.0404	-24.1632	0
55.0404	-23.0649	0.203295
55.0404	-21.9665	0.304543
55.0404	-20.8682	0.327024
55.0404	-19.7699	0.366569
55.0404	-18.6716	0.366979
55.0404	-17.5732	0.378252
55.0404	-16.4749	0.369767
55.0404	-15.3766	0.400873
55.0404	-14.2782	0.336487
55.0404	-13.1799	0.436748
55.0404	-12.0816	0.444274
55.0404	-10.9833	0.42219
55.0404	-9.88494	0.406313
55.0404	-8.78662	1.51901
55.0404	-7.68829	4.8847
55.0404	-6.58996	7.62341
55.0404	-5.49163	8.30976
55.0404	-4.39331	8.51073
55.0404	-3.29498	8.57652
55.0404	-2.19665	8.6875
55.0404	-1.09833	8.73363
55.0404	0	8.68105
56.1212	-28.5565	0
56.1212	-27.4582	0
56.1212	-26.3598	0.142446
56.1212	-25.2615	0.0279287
56.1212	-24.1632	0
56.1212	-23.0649	0.274619
56.1212	-21.9665	0.157389
56.1212	-20.8682	0.172381
56.1212	-19.7699	0.199811
56.1212	-18.6716	0.202207
56.1212	-17.5732	0.225169
56.1212	-16.4749	0.214818
56.1212	-15.3766	0.193231
56.1212	-14.2782	0.180727
56.1212	-13.1799	0.123318
56.1212	-12.0816	0.106749
56.1212	-10.9833	0.089267
56.1212	-9.88494	0.341297
56.1212	-8.78662	2.28488
56.1212	-7.68829	6.57817
56.1212	-6.58996	7.54829
56.1212	-5.49163	7.92062
56.1212	-4.39331	8.41086
56.1212	-3.29498	8.57344
56.1212	-2.19665	8.68696
56.1212	-1.09833	8.91161
56.1212	0	9.11831
57.202	-28.5565	0
57.202	-27.4582	0
57.202	-26.3598	0
57.202	-25.2615	0
57.202	-24.1632	0.268481
57.202	-23.0649	0.296035
57.202	-21.9665	0.304393
57.202	-20.8682	0.295434
57.202	-19.7699	0.267558
57.202	-18.6716	0.286108
57.202	-17.5732	0.263413
57.202	-16.4749	0.254021
57.202	-15.3766	0.252056
57.202	-14.2782	0.238795
57.202	-13.1799	0.239001
57.202	-12.0816	0.370913
57.202	-10.9833	1.14018
57.202	-9.88494	1.81259
57.202	-8.78662	4.73576
57.202	-7.68829	5.89742
57.202	-6.58996	5.86102
57.202	-5.49163	5.91196
57.202	-4.39331	6.07309
57.202	-3.29498	6.33896
57.202	-2.19665	6.59338
57.202	-1.09833	7.33342
57.202	0	7.53715
58.2828	-28.5565	0
58.2828	-27.4582	0.161801
58.2828	-26.3598	0.189982
58.2828	-25.2615	0.263203
58.2828	-24.1632	0.372968
58.2828	-23.0649	0.34089
58.2828	-21.9665	0.373688
58.2828	-20.8682	0.424752
58.2828	-19.7699	0.549325
58.2828	-18.6716	0.594533
58.2828	-17.5732	0.745673
58.2828	-16.4749	1.19326
58.2828	-15.3766	1.4394
58.2828	-14.2782	1.43244
58.2828	-13.1799	1.38843
58.2828	-12.0816	1.57806
58.2828	-10.9833	4.32832
58.2828	-9.88494	4.49434
58.2828	-8.78662	4.51097
58.2828	-7.68829	4.57536
58.2828	-6.58996	4.69732
58.2828	-5.49163	4.9308
58.2828	-4.39331	5.42933
58.2828	-3.29498	5.80045
58.2828	-2.19665	6.19258
58.2828	-1.09833	6.33437
58.2828	0	6.53717
59.3636	-28.5565	0
59.3636	-27.4582	0.336247
59.3636	-26.3598	1.09994
59.3636	-25.2615	1.95856
59.3636	-24.1632	2.34888
59.3636	-23.0649	2.19065
59.3636	-21.9665	2.26925
59.3636	-20.8682	2.36699
59.3636	-19.7699	2.57424
59.3636	-18.6716	2.75931
59.3636	-17.5732	2.96375
59.3636	-16.4749	3.85623
59.3636	-15.3766	4.49414
59.3636	-14.2782	4.47049
59.3636	-13.1799	4.47634
59.3636	-12.0816	4.35389
59.3636	-10.9833	4.24488
59.3636	-9.88494	4.13796
59.3636	-8.78662	4.18234
59.3636	-7.68829	4.29148
59.3636	-6.58996	4.42635
59.3636	-5.49163	4.74547
59.3636	-4.39331	5.32848
59.3636	-3.29498	5.83039
59.3636	-2.19665	6.22916
59.3636	-1.09833	6.32507
59.3636	0	6.44619
60.4444	-28.5565	0
60.4444	-27.4582	0
60.4444	-26.3598	1.62913
60.4444	-25.2615	5.04462
60.4444	-24.1632	5.54242
60.4444	-23.0649	5.41392
60.4444	-21.9665	5.41192
60.4444	-20.8682	5.41827
60.4444	-19.7699	5.39564
60.4444	-18.6716	5.38767
60.4444	-17.5732	5.35286
60.4444	-16.4749	5.35273
60.4444	-15.3766	5.3112
60.4444	-14.2782	5.2739
60.4444	-13.1799	5.26884
60.4444	-12.0816	5.23766
60.4444	-10.9833	5.23603
60.4444	-9.88494	5.26464
60.4444	-8.78662	5.27834
60.4444	-7.68829	5.26557
60.4444	-6.58996	5.30004
60.4444	-5.49163	5.37812
60.4444	-4.39331	5.45217
60.4444	-3.29498	5.6459
60.4444	-2.19665	5.81903
60.4444	-1.09833	5.88957
60.4444	0	6.04262
61.5253	-28.5565	0
61.5253	-27.4582	0
61.5253	-26.3598	2.15185
61.5253	-25.2615	6.37865
61.5253	-24.1632	6.83818
61.5253	-23.0649	6.70992
61.5253	-21.9665	6.6238
61.5253	-20.8682	6.45908
61.5253	-19.7699	6.82645
61.5253	-18.6716	6.91483
61.5253	-17.5732	6.77037
61.5253	-16.4749	6.81862
61.5253	-15.3766	6.90748
61.5253	-14.2782	6.98846
61.5253	-13.1799	7.11127
61.5253	-12.0816	7.1624
61.5253	-10.9833	7.24061
61.5253	-9.88494	7.23588
61.5253	-8.78662	7.18135
61.5253	-7.68829	7.06428
61.5253	-6.58996	7.05282
61.5253	-5.49163	7.03918
61.5253	-4.39331	7.02453
61.5253	-3.29498	7.23726
61.5253	-2.19665	7.38842
61.5253	-1.09833	7.39805
61.5253	0	7.43572
62.6061	-28.5565	0
62.6061	-27.4582	0
62.6061	-26.3598	1.60354
62.6061	-25.2615	2.77977
62.6061	-24.1632	2.72824
62.6061	-23.0649	2.58765
62.6061	-21.9665	2.4976
62.6061	-20.8682	2.38421
62.6061	-19.7699	2.81203
62.6061	-18.6716	2.73655
62.6061	-17.5732	2.81785
62.6061	-16.4749	2.83634
62.6061	-15.3766	2.82507
62.6061	-14.2782	2.93
62.6061	-13.1799	3.02085
62.6061	-12.0816	3.16911
62.6061	-10.9833	3.31077
62.6061	-9.88494	3.35323
62.6061	-8.78662	4.27567
62.6061	-7.68829	7.25736
62.6061	-6.58996	7.8753
62.6061	-5.49163	8.04896
62.6061	-4.39331	8.12449
62.6061	-3.29498	8.24776
62.6061	-2.19665	8.3884
62.6061	-1.09833	8.42593
62.6061	0	8.48128
63.6869	-28.5565	0
63.6869	-27.4582	0
63.6869	-26.3598	0
63.6869	-25.2615	0
63.6869	-24.1632	0
63.6869	-23.0649	0
63.6869	-21.9665	0.04133
63.6869	-20.8682	0.0251611
63.6869	-19.7699	0.0509273
63.6869	-18.6716	0.0233883
63.6869	-17.5732	0.061656
63.6869	-16.4749	0.0637307
63.6869	-15.3766	0.0649241
63.6869	-14.2782	0.0906815
63.6869	-13.1799	0.10247
63.6869	-12.0816	0.19969
63.6869	-10.9833	1.09955
63.6869	-9.88494	3.9324
63.6869	-8.78662	5.62147
63.6869	-7.68829	7.04829
63.6869	-6.58996	7.43005
63.6869	-5.49163	7.68409
63.6869	-4.39331	7.82526
63.6869	-3.29498	7.85114
63.6869	-2.19665	7.96316
63.6869	-1.09833	8.01962
63.6869	0	8.19908
64.7677	-28.5565	0
64.7677	-27.4582	0
64.7677	-26.3598	0
64.7677	-25.2615	0
64.7677	-24.1632	0
64.7677	-23.0649	0
64.7677	-21.9665	0.241607
64.7677	-20.8682	0.255224
64.7677	-19.7699	0.238119
64.7677	-18.6716	0.275647
64.7677	-17.5732	0.26396
64.7677	-16.4749	0.268461
64.7677	-15.3766	0.291396
64.7677	-14.2782	0.285194
64.7677	-13.1799	0.280612
64.7677	-12.0816	0.282044
64.7677	-10.9833	0.652655
64.7677	-9.88494	1.81777
64.7677	-8.78662	2.91356
64.7677	-7.68829	4.23507
64.7677	-6.58996	5.10745
64.7677	-5.49163	7.25186
64.7677	-4.39331	8.8078
64.7677	-3.29498	9.5258
64.7677	-2.19665	10.1697
64.7677	-1.09833	10.3977
64.7677	0	10.5779
65.8485	-28.5565	0
65.8485	-27.4582	0
65.8485	-26.3598	0
65.8485	-25.2615	0
65.8485	-24.1632	0
65.8485	-23.0649	0
65.8485	-21.9665	0.318911
65.8485	-20.8682	0.449579
65.8485	-19.7699	0.338839
65.8485	-18.6716	0.319382
65.8485	-17.5732	0.313213
65.8485	-16.4749	0.300195
65.8485	-15.3766	0.276156
65.8485	-14.2782	0.285939
65.8485	-13.1799	0.325426
65.8485	-12.0816	0.465784
65.8485	-10.9833	1.21483
65.8485	-9.88494	2.76905
65.8485	-8.78662	4.69397
65.8485	-7.68829	6.23525
65.8485	-6.58996	7.03583
65.8485	-5.49163	7.69106
65.8485	-4.39331	8.61901
65.8485	-3.29498	9.00676
65.8485	-2.19665	9.14084
65.8485	-1.09833	9.13313
65.8485	0	9.14845
66.9293	-28.5565	0
66.9293	-27.4582	0
66.9293	-26.3598	0
66.9293	-25.2615	0
66.9293	-24.1632	0
66.9293	-23.0649	0
66.9293	-21.9665	0
66.9293	-20.8682	0
66.9293	-19.7699	0
66.9293	-18.6716	0
66.9293	-17.5732	0.2
66.9293	-16.4749	0.2
66.9293	-15.3766	0.2
66.9293	-14.2782	0.2
66.9293	-13.1799	0
66.9293	-12.0816	0.5
66.9293	-10.9833	1.71932
66.9293	-9.88494	3.0538
66.9293	-8.78662	4.87051
66.9293	-7.68829	6.40108
66.9293	-6.58996	7.67695
66.9293	-5.49163	9.05992
66.9293	-4.39331	9.8138
66.9293	-3.29498	9.90194
66.9293	-2.19665	9.76637
66.9293	-1.09833	9.62993
66.9293	0	9.51862
68.0101	-28.5565	0
68.0101	-27.4582	0
68.0101	-26.3598	0
68.0101	-25.2615	0
68.0101	-24.1632	0.211023
68.0101	-23.0649	0.443946
68.0101	-21.9665	0
68.0101	-20.8682	0
68.0101	-19.7699	0
68.0101	-18.6716	0
68.0101	-17.5732	0
68.0101	-16.4749	0
68.0101	-15.3766	0.1
68.0101	-14.2782	0.3
68.0101	-13.1799	0.3
68.0101	-12.0816	1.35163
68.0101	-10.9833	1.43718
68.0101	-9.88494	1.94314
68.0101	-8.78662	3.41821
68.0101	-7.68829	5.04134
68.0101	-6.58996	6.72323
68.0101	-5.49163	9.72189
68.0101	-4.39331	10.6597
68.0101	-3.29498	10.6144
68.0101	-2.19665	10.5519
68.0101	-1.09833	10.5346
68.0101	0	10.3858
69.0909	-28.5565	0.231554
69.0909	-27.4582	0
69.0909	-26.3598	0
69.0909	-25.2615	0
69.0909	-24.1632	0
69.0909	-23.0649	0
69.0909	-21.9665	0.645769
69.0909	-20.8682	0.629727
69.0909	-19.7699	0.595584
69.0909	-18.6716	0.636349
69.0909	-17.5732	0.5
69.0909	-16.4749	0.611663
69.0909	-15.3766	0.625122
69.0909	-14.2782	0.631815
69.0909	-13.1799	0.895947
69.0909	-12.0816	1.10935
69.0909	-10.9833	1.29954
69.0909	-9.88494	1.90616
69.0909	-8.78662	3.50232
69.0909	-7.68829	5.35771
69.0909	-6.58996	6.89351
69.0909	-5.49163	7.57723
69.0909	-4.39331	7.9768
69.0909	-3.29498	8.1663
69.0909	-2.19665	8.3336
69.0909	-1.09833	8.44777
69.0909	0	8.62409
70.1717	-28.5565	0
70.1717	-27.4582	0
70.1717	-26.3598	0
70.1717	-25.2615	0.618738
70.1717	-24.1632	0.542165
70.1717	-23.0649	0.646495
70.1717	-21.9665	0.648062
70.1717	-20.8682	0.639815
70.1717	-19.7699	0.728915
70.1717	-18.6716	0.639023
70.1717	-17.5732	0.785302
70.1717	-16.4749	0.795388
70.1717	-15.3766	0.755317
70.1717	-14.2782	0.784721
70.1717	-13.1799	2.78296
70.1717	-12.0816	4.40679
70.1717	-10.9833	4.73892
70.1717	-9.88494	5.42232
70.1717	-8.78662	6.37005
70.1717	-7.68829	6.54116
70.1717	-6.58996	6.66552
70.1717	-5.49163	6.89114
70.1717	-4.39331	7.54175
70.1717	-3.29498	7.92819
70.1717	-2.19665	8.0505
70.1717	-1.09833	8.16806
70.1717	0	8.25625
71.2525	-28.5565	0.382768
71.2525	-27.4582	0
71.2525	-26.3598	0
71.2525	-25.2615	1.12156
71.2525	-24.1632	1.98951
71.2525	-23.0649	2.37788
71.2525	-21.9665	2.80179
71.2525	-20.8682	3.68488
71.2525	-19.7699	3.73331
71.2525	-18.6716	3.80859
71.2525	-17.5732	3.85285
71.2525	-16.4749	3.90316
71.2525	-15.3766	3.96735
71.2525	-14.2782	3.97765
71.2525	-13.1799	4.0181
71.2525	-12.0816	4.05187
71.2525	-10.9833	4.08611
71.2525	-9.88494	4.15492
71.2525	-8.78662	4.28189
71.2525	-7.68829	4.40492
71.2525	-6.58996	4.48587
71.2525	-5.49163	4.68129
71.2525	-4.39331	4.88934
71.2525	-3.29498	5.01469
71.2525	-2.19665	5.09945
71.2525	-1.09833	5.04924
71.2525	0	5.16462
72.3333	-28.5565	0
72.3333	-27.4582	0
72.3333	-26.3598	0
72.3333	-25.2615	0
72.3333	-24.1632	0
72.3333	-23.0649	0.980193
72.3333	-21.9665	1.74946
72.3333	-20.8682	4.63901
72.3333	-19.7699	4.85549
72.3333	-18.6716	5.133
72.3333	-17.5732	5.04151
72.3333	-16.4749	5.10085
72.3333	-15.3766	5.14061
72.3333	-14.2782	5.15988
72.3333	-13.1799	5.2318
72.3333	-12.0816	5.40454
72.3333	-10.9833	5.4306
72.3333	-9.88494	5.35377
72.3333	-8.78662	5.4195
72.3333	-7.68829	5.50624
72.3333	-6.58996	5.65421
72.3333	-5.49163	5.90476
72.3333	-4.39331	6.17203
72.3333	-3.29498	6.43696
72.3333	-2.19665	6.6276
72.3333	-1.09833	6.47742
72.3333	0	6.44073
73.4141	-28.5565	0
73.4141	-27.4582	0
73.4141	-26.3598	0
73.4141	-25.2615	0
73.4141	-24.1632	0
73.4141	-23.0649	1.12365
73.4141	-21.9665	2.18111
73.4141	-20.8682	3.06463
73.4141	-19.7699	3.29851
73.4141	-18.6716	3.43785
73.4141	-17.5732	3.49139
73.4141	-16.4749	3.71547
73.4141	-15.3766	3.91703
73.4141	-14.2782	4.2178
73.4141	-13.1799	4.41243
73.4141	-12.0816	5.03639
73.4141	-10.9833	5.59722
73.4141	-9.88494	6.09825
73.4141	-8.78662	6.47095
73.4141	-7.68829	6.71904
73.4141	-6.58996	7.02215
73.4141	-5.49163	7.32401
73.4141	-4.39331	7.80868
73.4141	-3.29498	8.19876
73.4141	-2.19665	8.48064
73.4141	-1.09833	8.4535
73.4141	0	8.09826
74.4949	-28.5565	0
74.4949	-27.4582	0
74.4949	-26.3598	0
74.4949	-25.2615	0
74.4949	-24.1632	0.482744
74.4949	-23.0649	0.2
74.4949	-21.9665	1.30514
74.4949	-20.8682	1.95179
74.4949	-19.7699	3.01453
74.4949	-18.6716	3.20906
74.4949	-17.5732	3.34557
74.4949	-16.4749	3.56434
74.4949	-15.3766	3.86147
74.4949	-14.2782	4.35062
74.4949	-13.1799	4.6094
74.4949	-12.0816	5.03162
74.4949	-10.9833	5.62211
74.4949	-9.88494	6.22558
74.4949	-8.78662	6.61241
74.4949	-7.68829	7.06159
74.4949	-6.58996	7.46961
74.4949	-5.49163	7.67102
74.4949	-4.39331	7.98768
74.4949	-3.29498	8.48389
74.4949	-2.19665	9.06452
74.4949	-1.09833	9.30646
74.4949	0	9.00863
75.5758	-28.5565	0
75.5758	-27.4582	0
75.5758	-26.3598	0
75.5758	-25.2615	0.241132
75.5758	-24.1632	0.16995
75.5758	-23.0649	0.337484
75.5758	-21.9665	0.295226
75.5758	-20.8682	0.5
75.5758	-19.7699	1.90503
75.5758	-18.6716	2.23568
75.5758	-17.5732	2.50881
75.5758	-16.4749	2.79579
75.5758	-15.3766	3.01578
75.5758	-14.2782	3.1946
75.5758	-13.1799	3.32347
75.5758	-12.0816	3.53145
75.5758	-10.9833	3.88802
75.5758	-9.88494	5.13358
75.5758	-8.78662	6.37236
75.5758	-7.68829	6.89908
75.5758	-6.58996	7.34447
75.5758	-5.49163	7.69266
75.5758	-4.39331	7.84801
75.5758	-3.29498	8.13155
75.5758	-2.19665	8.91413
75.5758	-1.09833	9.17363
75.5758	0	9.19607
76.6566	-28.5565	0
76.6566	-27.4582	0
76.6566	-26.3598	0
76.6566	-25.2615	0.295245
76.6566	-24.1632	0
76.6566	-23.0649	0.179899
76.6566	-21.9665	0.272784
76.6566	-20.8682	0.3
76.6566	-19.7699	0.504531
76.6566	-18.6716	0.587896
76.6566	-17.5732	0.704208
76.6566	-16.4749	0.826921
76.6566	-15.3766	0.871099
76.6566	-14.2782	0.87066
76.6566	-13.1799	0.886529
76.6566	-12.0816	1.02265
76.6566	-10.9833	1.61562
76.6566	-9.88494	2.64528
76.6566	-8.78662	3.79174
76.6566	-7.68829	5.15012
76.6566	-6.58996	6.72965
76.6566	-5.49163	7.67715
76.6566	-4.39331	8.05002
76.6566	-3.29498	8.33041
76.6566	-2.19665	8.86446
76.6566	-1.09833	9.04792
76.6566	0	9.17793
77.7374	-28.5565	0
77.7374	-27.4582	0
77.7374	-26.3598	0
77.7374	-25.2615	0
77.7374	-24.1632	0
77.7374	-23.0649	0.154134
77.7374	-21.9665	0.0576261
77.7374	-20.8682	0.106477
77.7374	-19.7699	0.0494527
77.7374	-18.6716	0.0780045
77.7374	-17.5732	0.127404
77.7374	-16.4749	0.122088
77.7374	-15.3766	0.123269
77.7374	-14.2782	0.134672
77.7374	-13.1799	0.147795
77.7374	-12.0816	0.177175
77.7374	-10.9833	0.307952
77.7374	-9.88494	0.395846
77.7374	-8.78662	0.827555
77.7374	-7.68829	2.37029
77.7374	-6.58996	4.16623
77.7374	-5.49163	6.38243
77.7374	-4.39331	7.48644
77.7374	-3.29498	7.71864
77.7374	-2.19665	7.91202
77.7374	-1.09833	8.03841
77.7374	0	8.25339
78.8182	-28.5565	0
78.8182	-27.4582	0
78.8182	-26.3598	0
78.8182	-25.2615	0
78.8182	-24.1632	0
78.8182	-23.0649	0.0206857
78.8182	-21.9665	0
78.8182	-20.8682	0.0164263
78.8182	-19.7699	0.0550775
78.8182	-18.6716	0.11153
78.8182	-17.5732	0.1612
78.8182	-16.4749	0.172098
78.8182	-15.3766	0.188218
78.8182	-14.2782	0.20573
78.8182	-13.1799	0.213045
78.8182	-12.0816	0.196003
78.8182	-10.9833	0.15354
78.8182	-9.88494	0.281646
78.8182	-8.78662	0.980511
78.8182	-7.68829	2.34567
78.8182	-6.58996	4.08327
78.8182	-5.49163	6.12128
78.8182	-4.39331	7.4596
78.8182	-3.29498	7.88876
78.8182	-2.19665	8.1216
78.8182	-1.09833	8.36109
78.8182	0	8.66974
79.899	-28.5565	0
79.899	-27.4582	0
79.899	-26.3598	0
79.899	-25.2615	0
79.899	-24.1632	0
79.899	-23.0649	0
79.899	-21.9665	0
79.899	-20.8682	0.0951198
79.899	-19.7699	0.170443
79.899	-18.6716	0.235085
79.899	-17.5732	0.254214
79.899	-16.4749	0.273618
79.899	-15.3766	0.300933
79.899	-14.2782	0.340153
79.899	-13.1799	0.373955
79.899	-12.0816	0.422592
79.899	-10.9833	0.484078
79.899	-9.88494	0.875939
79.899	-8.78662	2.54003
79.899	-7.68829	3.89812
79.899	-6.58996	5.49998
79.899	-5.49163	6.67597
79.899	-4.39331	7.75059
79.899	-3.29498	8.19479
79.899	-2.19665	8.5891
79.899	-1.09833	8.8829
79.899	0	9.52361
80.9798	-28.5565	0
[truncated: 701 more rows]

## Sheet: Figure 4
Month	Depth	GPP (gO2 m-3 h-1)	RPL (gO2 m-3 h-1)	NPP (gO2 m-3 h-1)
1	0	0.14	-0.0655009	0.0744991
1	-1	0.144776	-0.0610254	0.0837501
1	-2	0.135165	-0.0588199	0.0763454
1	-4	0.0811106	-0.0483743	0.0327363
2	0	0.137245	-0.0640697	0.0731757
2	-1	0.178502	-0.0598611	0.118641
2	-2	0.152047	-0.0608973	0.0911498
2	-4	0.074794	-0.0486597	0.0261342
3	0	0.11194	-0.0638556	0.0480847
3	-1	0.159093	-0.0600788	0.0990145
3	-2	0.148192	-0.0614936	0.0866983
3	-4	0.067713	-0.0504083	0.0173047
4	0	0.209063	-0.0637741	0.145289
4	-1	0.180652	-0.059843	0.120809
4	-2	0.145942	-0.061571	0.0843712
4	-4	0.0634941	-0.0499897	0.0135044
5	0	0.145919	-0.063785	0.0821335
5	-1	0.21046	-0.0596459	0.150814
5	-2	0.147492	-0.0598516	0.08764
5	-4	0.0399347	-0.0503234	-0.0103887
6	0	0.20202	-0.0631363	0.138884
6	-1	0.193589	-0.0588993	0.13469
6	-2	0.165303	-0.0597717	0.105531
6	-4	0.0529562	-0.0495903	0.00336588
7	0	0.166232	-0.0631621	0.10307
7	-1	0.185254	-0.0589013	0.126352
7	-2	0.160225	-0.0607486	0.0994768
7	-4	0.0660783	-0.0492611	0.0168172
8	0	0.130905	-0.0635046	0.0674001
8	-1	0.170061	-0.0591768	0.110884
8	-2	0.148219	-0.0595875	0.0886317
8	-4	0.0785529	-0.0493956	0.0291573
9	0	0.16988	-0.0632106	0.10667
9	-1	0.182892	-0.0592386	0.123653
9	-2	0.135636	-0.0607111	0.0749248
9	-4	0.065564	-0.0488349	0.0167291
10	0	0.191929	-0.0629699	0.128959
10	-1	0.17123	-0.0582831	0.112947
10	-2	0.125626	-0.0602691	0.0653569
10	-4	0.0553842	-0.0484435	0.00694074
11	0	0.186392	-0.0634802	0.122912
11	-1	0.1469	-0.0583284	0.0885716
11	-2	0.159994	-0.0597931	0.100201
11	-4	0.0338268	-0.0480459	-0.0142191
12	0	0.119205	-0.0634802	0.0557245
12	-1	0.145042	-0.0583284	0.0867141
12	-2	0.113823	-0.0597931	0.0540303
12	-4	0.0625431	-0.0488228	0.0137203

## Sheet: Figure 5
Date	GPP (gO2 m-2 h-1)	CI	RPL (gO2 m-2 h-1)	CI	NPP (gO2 m-2 h-1)	CI	RBPL (gO2 m-2 h-1)	CI
2006-08-03	0.659	0.125014	-0.139	-0.0883571	0.52	0.0884096
2006-08-31	0.649	0.125014	-0.192	-0.11354	0.457	0.138736
2006-09-28	0.543	0.196196	-0.153	-0.138722	0.39	0.138732
2006-10-19	0.529	0.161847	-0.633	-0.114464	-0.104	0.114433
2006-11-16	0.586	0.192873	-0.317	-0.136377	0.269	0.136375	-0.502615	-0.136388
2006-12-18	0.151	0.199852	-0.51	-0.141335	-0.359	0.141325	-0.762923	-0.141359
2007-01-18	0.616	0.198096	-0.486	-0.140079	0.13	0.140063	-0.579462	-0.140087
2007-02-15	0.576	0.208255	-0.649	-0.147278	-0.073	0.147249	-1.04331	-0.147249
2007-03-15	0.330194	0.167619	-0.388194	-0.118541	-0.058	0.118514	-0.924144	-0.118538
2007-04-12	0.468412	0.203677	-0.375912	-0.118541	0.0925	0.144007	-0.46664	-0.138
2007-05-10	0.52311	0.239735	-0.28011	-0.14403	0.243	0.1695	-0.432219	-0.138
2007-06-07	0.642786	0.204437	-0.458786	-0.169518	0.184	0.144537	-0.393446	-0.138
2007-07-05	0.660791	0.192874	-0.306791	-0.144563	0.354	0.136378	-0.327527	-0.138
2007-08-02	0.658254	0.192893	-0.410254	-0.136373	0.248	0.136374	-0.35917	-0.138
2007-08-30	0.503866	0.207599	-0.278762	-0.136397	0.225104	0.121487	-0.460747	-0.138
2007-09-27	0.547306	0.207599	-0.58534	-0.138639	-0.0380335	0.03	-0.358565	-0.138
2007-10-25	0.390594	0.149823	-0.484122	-0.0930472	-0.0935283	0.0995691	-1.05233	-0.0930679
2007-11-22	0.620097	0.126206	-0.293842	-0.0785866	0.326255	0.0691849	-0.64869	-0.0786063
2007-12-13	0.158307	0.125382	-0.191837	-0.0842757	-0.0335301	0.0718137	-0.693223	-0.084274
2008-01-10	0.437412	0.11241	-0.2093	-0.0724626	0.228112	0.0713848	-0.517523	-0.0724669
2008-02-07	0.71357	0.120967	-0.347571	-0.0848342	0.365998	0.0780738	-0.673899	-0.084832
2008-03-06	0.461016	0.105266	-0.284905	-0.0781051	0.17611	0.0652046	-0.809229	-0.0781187
2008-04-03	0.445795	0.117161	-0.43415	-0.0638151	0.0116445	0.0696201	-0.511755	-0.0638265
2008-05-08	0.385802	0.199322	-0.53092	-0.115312	-0.145118	0.134369	-0.515844	-0.115316
2008-06-05	0.686149	0.0917683	-0.427034	-0.0659244	0.259115	0.0469359	-0.295952	-0.0658878
2008-07-03	0.807762	0.124029	-0.42111	-0.094781	0.386652	0.0779091	-0.519369	-0.0944613
2008-07-31	0.540686	0.0961458	-0.298202	-0.0768204	0.242484	0.0756778	-0.556222	-0.0944613
2008-08-28	0.558372	0.0961458	-0.281371	-0.0588598	0.277001	0.0734466	-0.326436	-0.0588561
2008-09-25	0.52927	0.198138	-0.190099	-0.113957	0.339172	0.117412	-0.411669	-0.113549
2008-10-16	0.634421	0.0820626	-0.20732	-0.0487253	0.427101	0.0584829	-0.895885	-0.0487617
2008-11-13	0.718216	0.0862809	-0.643481	-0.0509802	0.074735	0.0645102	-1.14755	-0.0512043
2008-12-12	0.749482	0.196175	-0.469231	-0.145456	0.280252	0.122848	-0.337883	-0.145452
2009-01-09	0.992274	0.272437	-0.572406	-0.178811	0.419869	0.160443	-0.651328	-0.178799
2009-02-05	0.973859	0.226557	-0.483559	-0.178789	0.4903	0.106638	-1.0901	-0.178684
2009-03-05	0.467716	0.158172	-0.24332	-0.120246	0.224396	0.0842535	-0.512298	-0.120261
2009-04-02	0.388081	0.0934609	-0.269871	-0.0568795	0.11821	0.0469717	-0.448219	-0.0569538
2009-05-12	0.499078	0.0781962	-0.196877	-0.0478246	0.302201	0.052647	-0.495854	-0.0478148
2009-06-04	0.62244	0.0773661	-0.219724	-0.0459732	0.402716	0.0538095	-0.400136	-0.0460533
2009-07-02	0.755888	0.120106	-0.346244	-0.104974	0.409644	0.0577749	-0.613155	-0.104972
2009-07-30	0.401564	0.121396	-0.322088	-0.0938602	0.0794756	0.0653231	-0.392062	-0.0460533
2009-09-01	0.421361	0.121396	-0.213378	-0.0593984	0.207983	0.0804396	-0.315232	-0.0938549
2009-09-29	0.446938	0.116055	-0.193037	-0.0593984	0.253901	0.0804396	-0.583134	-0.0593912
2009-10-20	0.599713	0.0674419	-0.160474	-0.0574618	0.43924	0.0724104	-0.761552	-0.0575261
2009-11-12	0.236879	0.0677022	-0.138889	-0.0532925	0.0979902	0.0646287	-0.755074	-0.0536486
2009-12-10	0.641534	0.0898895	-0.327969	-0.0546797	0.313565	0.0595086	-1.19977	-0.0548291
2010-01-14	0.357653	0.107659	-0.16615	-0.0819618	0.191503	0.0609049	-0.612396	-0.0819619
2010-02-11	0.471939	0.100337	-0.382295	-0.0751044	0.0896439	0.0602644	-0.561206	-0.0752009
2010-03-11	0.477455	0.129955	-0.287294	-0.094743	0.190161	0.076386	-0.531935	-0.0947552
2010-04-08	0.596043	0.135096	-0.287611	-0.0902965	0.308432	0.0606896	-0.398533	-0.090297
2010-05-06	0.588833	0.0902993	-0.289133	-0.061548	0.299701	0.0637632	-0.3	-0.0615395
2010-06-03	0.75507	0.109137	-0.28959	-0.0808119	0.465481	0.0652912	-0.251122	-0.0808036
2010-09-02	0.67241	0.246918	-0.347249	-0.149291	0.325161	0.116628	-0.503285	-0.139291
2010-09-30	0.583226	0.233068	-0.258065	-0.13298	0.325161	0.116628	-0.260125	-0.0808036
2010-10-21	0.243034	0.167145	-0.166258	-0.11667	0.0767754	0.0996425	-0.429238	-0.149288
2010-11-18	0.462404	0.201356	-0.267308	-0.134688	0.195096	0.120371	-0.882374	-0.116691
2010-12-16	1.2629	0.534732	-0.59791	-0.378494	0.66499	0.278345	-0.598247	-0.134733
2011-01-14	0.562586	0.117622	-0.269912	-0.0898508	0.292674	0.0623454	-0.709731	-0.0898507
2011-02-11	0.483339	0.104757	-0.199482	-0.0740929	0.283857	0.0557998	-1.18907	-0.0741025
2011-03-10	0.784545	0.191916	-0.464854	-0.132348	0.319691	0.105756	-0.3785	-0.132338
2011-04-07	0.939307	0.141477	-0.481492	-0.105416	0.457815	0.0734735	-0.442274	-0.105417
2011-05-05	0.819449	0.10052	-0.348671	-0.0878414	0.470778	0.0468223	-0.324137	-0.087824
2011-06-02	0.619209	0.0936115	-0.399005	-0.0607721	0.220203	0.0606336	-0.328246	-0.0607316
2011-06-30	0.606815	0.0484781	-0.447964	-0.0577173	0.158851	0.0610709	-0.262754	-0.0607316
2011-07-28	0.613117	0.0484781	-0.269377	-0.0546624	0.34374	0.043596	-0.313621	-0.054621
2011-08-22	0.675648	0.120047	-0.495937	-0.0805507	0.179711	0.0610709	-0.665208	-0.0805182
2011-09-21	0.646196	0.0675809	-0.171401	-0.04977	0.474795	0.0471773	-0.528486	-0.0498031
2011-10-19	0.581695	0.0849733	-0.159509	-0.0685438	0.422187	0.0517181	-0.588561	-0.0685462
2011-11-17	1.00075	0.185926	-0.591636	-0.118601	0.409112	0.0914086	-1.12137	-0.118608
2011-12-15	0.534693	0.0820935	-0.187433	-0.0586499	0.347259	0.0494727	-0.586618	-0.0586544
2012-01-12	0.702435	0.146174	-0.263717	-0.100125	0.438717	0.0782737	-0.518009	-0.100132
2012-02-16	0.712845	0.117437	-0.17143	-0.092122	0.541415	0.0558004	-0.592847	-0.0921383
2012-03-20	0.859941	0.0869683	-0.271407	-0.0566299	0.588534	0.0473291	-0.384212	-0.056639
2012-04-24	0.752165	0.150714	-0.235816	-0.0818641	0.51635	0.0913899	-0.374689	-0.081822
2012-05-29	0.610727	0.0528968	-0.281299	-0.0591801	0.329427	0.0587697	-0.50738	-0.0590997
2012-06-26	0.592299	0.199723	-0.298659	-0.137058	0.293639	0.137909	-0.348793	-0.137049
2012-08-02	0.87226	0.0808329	-0.341924	-0.0561949	0.530336	0.0492286	-0.299907	-0.0561729
2012-09-06	0.566057	0.0668575	-0.303318	-0.0444212	0.262739	0.0444489	-0.516054	-0.0444186
2012-10-12	0.723069	0.102479	-0.466528	-0.0818778	0.256542	0.0455925	-1.00077	-0.0819117
2012-11-08	0.528075	0.103062	-0.161109	-0.085726	0.366966	0.055478	-0.249785	-0.0857262
2012-12-13	0.324427	0.0747469	-0.133487	-0.0606845	0.19094	0.0435506	-0.455364	-0.0606841
2013-01-13	1.00348	0.0782369	-0.832515	-0.0625044	0.17097	0.048682	-1.27255	-0.062495
2013-02-14	0.596213	0.0790257	-0.190059	-0.0621188	0.406153	0.0452608	-0.700713	-0.0621258
2013-03-14	0.742708	0.0785592	-0.341064	-0.0562914	0.401644	0.0456352	-1.38191	-0.0563472
2013-04-18	0.588506	0.0630167	-0.242516	-0.0528318	0.345989	0.0502953	-0.406715	-0.0527134
2013-05-25	0.541293	0.093841	-0.331541	-0.0664112	0.209752	0.0493684	-0.651384	-0.0664098
2013-06-20	0.498526	0.118558	-0.215128	-0.0823943	0.283399	0.0667464	-0.285755	-0.082394
2013-08-01	0.602817	0.170423	-0.389807	-0.152976	0.21301	0.0494154	-0.655286	-0.152897
2013-09-05	1.03113	0.0752342	-0.553624	-0.0547452	0.477504	0.0428545	-0.317779	-0.0547085
2013-10-03	0.476216	0.178354	-0.355039	-0.153518	0.121177	0.0632128	-0.78253	-0.153515
2013-11-07	0.483564	0.104029	-0.300483	-0.0750026	0.183081	0.0669133	-0.805421	-0.0749045
2013-12-13	0.502157	0.0819086	-0.204951	-0.060102	0.297206	0.0468962	-0.708074	-0.0600996
2014-01-09	0.676059	0.209679	-0.549854	-0.129377	0.126205	0.137703	-1.17214	-0.129403
2014-02-06	0.899428	0.0860962	-0.593374	-0.057756	0.306054	0.0534042	-0.554864	-0.0572666
2014-03-13	0.385045	0.0658991	-0.181834	-0.0546658	0.203212	0.0447913	-0.39301	-0.054659
2014-04-10	0.857385	0.172394	-0.412282	-0.104249	0.445103	0.0977023	-0.418752	-0.104266
2014-05-08	0.562704	0.0766779	-0.416156	-0.0513157	0.146548	0.0463948	-0.445007	-0.0534108
2014-06-05	0.726331	0.0790191	-0.521567	-0.0499167	0.204763	0.0472307	-0.397488	-0.052691
2014-07-03	0.55687	0.199161	-0.307491	-0.130663	0.249379	0.1151	-0.391485	-0.130733
2014-09-25	0.683842	0.17516	-0.351331	-0.106834	0.332511	0.0989429	-0.326854	-0.0653664
2014-10-30	0.605314	0.0937721	-0.25532	-0.0676268	0.349994	0.0579578	-1.00149	-0.137053
2014-12-04	0.542134	0.179643	-0.375118	-0.137056	0.167017	0.0952257	-0.482466	-0.0676291
2015-01-08	1.092	0.213159	-0.499863	-0.135458	0.592135	0.124452	-0.853437	-0.135478
2015-02-05	0.701571	0.229775	-0.419716	-0.17378	0.281855	0.121717	-0.925585	-0.173805
2015-03-05	0.946702	0.203337	-0.556333	-0.141916	0.390369	0.114887	-0.675851	-0.141929
2015-04-09	0.788871	0.176899	-0.289987	-0.110052	0.498884	0.108057	-0.450012	-0.110052
2015-05-14	0.560708	0.0931768	-0.251975	-0.0686798	0.308733	0.04397	-0.257435	-0.068681
2015-06-11	0.820445	0.201539	-0.354147	-0.111548	0.466298	0.115419	-0.320158	-0.0695442
2015-07-02	0.819685	0.202195	-0.210171	-0.132576	0.609514	0.100875	-0.40417	-0.132577
2015-08-13	0.840317	0.146823	-0.292147	-0.0875017	0.54817	0.0793919	-0.442262	-0.0873644
2015-09-17	0.593781	0.104274	-0.205093	-0.0790827	0.388688	0.0669253	-0.430925	-0.0790801
2015-10-15	0.771212	0.247871	-0.273452	-0.169524	0.49776	0.125027	-0.227691	-0.169522
2015-11-12	0.457346	0.125191	-0.256596	-0.0953633	0.20075	0.0680812	-0.336132	-0.0953532
2015-12-10	0.429544	0.0694888	-0.250975	-0.0694533	0.178569	0.066807	-0.311542	-0.0695442

## Sheet: Figure 6
Date	GPP:Rtotal
2006-08-03
2006-08-31
2006-09-28
2006-10-19
2006-11-16	0.396662
2006-12-18	0.0679983
2007-01-18	0.335765
2007-02-15	0.196335
2007-03-15	0.143852
2007-04-12	0.35515
2007-05-10	0.464382
2007-06-07	0.523443
2007-07-05	0.68702
2007-08-02	0.573924
2007-08-30	0.406993
2007-09-27	0.406317
2007-10-25	0.143873
2007-11-22	0.349265
2007-12-13	0.0905246
2008-01-10	0.312384
2008-02-07	0.383255
2008-03-06	0.233712
2008-04-03	0.304917
2008-05-08	0.25371
2008-06-05	0.671199
2008-07-03	0.56101
2008-07-31	0.396914
2008-08-28	0.58939
2008-09-25	0.50173
2008-10-16	0.296595
2008-11-13	0.223044
2008-12-12	0.572128
2009-01-09	0.467114
2009-02-05	0.334346
2009-03-05	0.35172
2009-04-02	0.331718
2009-05-12	0.430536
2009-06-04	0.622785
2009-07-02	0.493246
2009-07-30	0.373971
2009-09-01	0.498032
2009-09-29	0.321886
2009-10-20	0.331508
2009-11-12	0.131117
2009-12-10	0.20915
2010-01-14	0.229821
2010-02-11	0.28961
2010-03-11	0.337525
2010-04-08	0.536414
2010-05-06	0.657272
2010-06-03	0.933506
2010-09-02	0.477912
2010-09-30	0.70372
2010-10-21	0.223954
2010-11-18	0.206618
2010-12-16	0.607535
2011-01-14	0.296302
2011-02-11	0.173618
2011-03-10	0.597676
2011-04-07	0.660921
2011-05-05	0.803467
2011-06-02	0.591099
2011-06-30	0.621584
2011-07-28	0.685073
2011-08-22	0.372864
2011-09-21	0.505493
2011-10-19	0.402179
2011-11-17	0.318256
2011-12-15	0.34413
2012-01-12	0.472218
2012-02-16	0.471087
2012-03-20	0.755306
2012-04-24	0.73176
2012-05-29	0.479173
2012-06-26	0.6029
2012-08-02	0.884903
2012-09-06	0.410814
2012-10-12	0.275359
2012-11-08	0.689828
2012-12-13	0.274228
2013-01-13	0.267433
2013-02-14	0.34105
2013-03-14	0.230762
2013-04-18	0.544337
2013-05-25	0.341308
2013-06-20	0.642103
2013-08-01	0.358667
2013-09-05	0.804373
2013-10-03	0.234139
2013-11-07	0.22956
2013-12-13	0.2734
2014-01-09	0.210646
2014-02-06	0.479603
2014-03-13	0.378229
2014-04-10	0.660007
2014-05-08	0.436336
2014-06-05	0.556577
2014-07-03	0.519929
2014-09-25	0.642912
2014-10-30	0.251847
2014-12-04	0.358715
2015-01-08	0.435356
2015-02-05	0.284249
2015-03-05	0.467847
2015-04-09	0.641012
2015-05-14	0.72129
2015-06-11	0.816778
2015-07-02	0.80453
2015-08-13	0.699155
2015-09-17	0.532915
2015-10-15	0.928886
2015-11-12	0.439648
2015-12-10	0.431992

## Sheet: Figure 7
Estratification			Estratification
Secchi	RLLF		GPP	RLLF
1.2575	29.4629		0.595	29.4629
1.45429	28.1652		0.572075	28.1652
1.36286	36.6283		0.564834	36.6283
1.15857	49.7393		0.50505	49.7393
1.49	17.4566		0.612173	17.4566
1.4475	23.7949		0.713036	23.7949
1.365	34.3433		0.708908	34.3433
1.51143	43.1724		0.64017	43.1724
1.55	12.7488		0.677427	12.7488
1.7	8.89218		0.73323	8.89218

## Sheet: Table 1
Year	Period		Temperature (0C)			Secchi depth (m)			RLLF
	S	C	S	C	A	S	C	A	S	C	A
20061	Aug-Sep	Oct 2006-Mar 2007	21.85	19.62	21.22	1.24	1.6	1.42	29.46	15.05	30.94
2007	Apr-Sep	Oct 2007-Mar2 008	21.16	19.32	20.35	1.44	2.38	1.91	28.17	16.11	22.12
2008	Apr-Sep	Oct 2008-Mar 2009	21.23	19.98	20.47	1.39	2.44	1.91	36.63	30.88	32.17
2009	Apr-Sep	Oct 2009-Feb 2010	21.87	19.69	20.9	1.15	1.88	1.51	49.74	27.96	40.81
2010	Mar-Sep	Oct 2010-Feb 2011	20.05	18.77	19.47	1.31	2.52	1.91	17.46	5.73	13.39
2011	Mar-Oct	Nov 2011-Feb 2012	20.73	19.1	20.14	1.38	1.9	1.64	23.79	16.33	19.59
2012	Mar-Sep	Oct 2012-Mar 2013	21.19	19.45	20.51	1.37	2.01	1.69	34.34	31.77	30.38
2013	Apr-Oct	Nov 2013-Mar 2014	21.59	20.07	20.73	1.51	2	1.76	43.17	9.73	37.06
2014	Apr-Sep	Oct 2014-Feb 2015	21.21	19.79	20.48	1.56	2.44	2	12.75	0.56	7.74
2015	Mar-Nov	–	21.18	–	20.74	1.65	–	1.65	8.89	–	6.77
Mean			21.21	19.53	20.5	1.4	2.13	1.74	28.44	17.12	20.5

## Sheet: Table 2
	Production Layer									Full Ecosystem
Year	GPP			Rpl			NPP			RTotal3			Net Metabolism
	S	C	A	S	C	A	S	C	A	S	C	A	S	C	A
20061	3.57	2.46	3.04	-1.63	-2.56	-1.82	1.94	-0.1	1.22	–	-9.05	–	–	-6.59	–
2007	3.54	2.55	3.04	-2.37	-1.66	-2.33	1.17	0.88	0.71	-5.67	-8.09	-7.38	-2.12	-5.55	-4.34
2008	3.54	4.4	3.47	-2.31	-2.56	-2.15	1.22	1.84	1.31	-6.05	-9.79	-7.12	-2.51	-5.38	-3.66
2009	3.16	2.51	3.35	-1.58	-1.27	-1.65	1.59	1.23	1.69	-5.6	-8.2	-7.22	-2.43	-5.7	-3.87
2010	3.73	3.23	3.4	-1.78	-1.61	-1.74	1.95	1.62	1.65	-5	-8.39	-5.97	-1.27	-5.16	-2.57
2011	4.4	3.83	4.03	-2.38	-1.48	-2.05	2.02	2.34	1.98	-5.78	-7.62	-7.03	-1.38	-3.79	-3.01
2012	4.32	3.45	3.84	-1.77	-1.93	-1.56	2.56	1.51	2.28	-5.31	-8.42	-5.79	-0.99	-4.97	-1.95
2013	3.86	3.2	3.72	-2.09	-1.99	-2.07	1.77	1.22	1.64	-7.65	-8.35	-8.4	-3.79	-5.15	-4.69
2014	4.21	3.98	3.81	-2.5	-2.1	-2.32	1.7	1.89	1.49	-5.78	-9.31	-7.1	-1.57	-5.33	-3.29
2015	4.42	–	4.31	-1.79	–	-1.87	2.63	–	2.44	-5.24	–	-5.99	-0.82	–	-1.68
Mean	3.88	3.29	3.6	-2.06	-1.83	-1.97	1.86	1.38	1.64	-5.79	-8.58	-6.89	-1.91	-5.29	-3.29

## Sheet: Table 3
	Period			f-ratio
Year	Stratification		Circulation	S	C	A
2006	Aug-Sep		Oct 2006-Mar 2007	0.54	-0.04	0.4
2007	Apr-Sep		Oct 2007-Mar 2008	0.33	0.35	0.23
2008	Apr-Sep		Oct 2008-Mar 2009	0.35	0.42	0.38
2009	Apr-Sep		Oct 2009-Feb 2010	0.5	0.49	0.51
2010	Mar-Sep		Oct 2010-Feb 2011	0.52	0.5	0.49
2011	Mar-Oct		Nov 2011-Feb 2012	0.46	0.61	0.49
2012	Mar-Sep		Oct 2012-Mar 2013	0.59	0.44	0.59
2013	Apr-Oct		Nov 2013-Mar 2014	0.46	0.38	0.44
2014	Apr-Sep		Oct 2014-Feb 2015	0.4	0.47	0.39
2015	Mar-Nov		–	0.6	–	0.57
Mean				0.48	0.4	0.45
